# Supplementary material for: Turnover of southern cypresses in the post‐Gondwanan world: extinction, transoceanic dispersal, adaptation and rediversification
Source: PubMed Central journal article supplement (PMC6587739; doi:10.1111/nph.15561), 2018-11-23
Supplement: NPH-221-2308-s001.pdf [file NPH-221-2308-s001.pdf]

## **New Phytologist Supporting Information**

Article title: **Turnover of southern cypresses in the post-Gondwanan world: extinction, transoceanic dispersal, adaptation and rediversification**

Authors: Michael D. Crisp, Lyn G. Cook, David M. J. S. Bowman, Meredith Cosgrove, Yuji Isagi and Shota Sakaguchi

Article acceptance date: 15 October 2018

The following Supporting Information is available for this article:

**Fig. S1** Maximum likelihood phylogeny of the cpDNA dataset, estimated using a partitioned RAxML analysis.

**Fig. S2** Maximum likelihood phylogeny of the nDNA dataset, estimated using an unpartitioned RAxML analysis.

**Fig. S3** Maximum likelihood phylogeny of combined cpDNA and nDNA datasets, using a partitioned RAxML analysis.

**Fig. S4** Leaf phyllotaxis reconstructed on the tree to guide placement of “*C. octothamna*” fossil for calibration.

**Fig. S5** Leaf dimorphism and monomorphism reconstructed on the tree, to guide placement of “*C. octothamna*” fossil for calibration.

**Fig. S6** Cone-scale phyllotaxis reconstructed on the tree, to guide placement of “*C. octothamna*” fossil for calibration.

**Fig. S7** Time tree of Cupressaceae estimated from the combined cpDNA-nDNA dataset, calibrated with “*C. octothamna*” but not constrained to nDNA topology.

**Fig. S8** Parsimony reconstruction of the fire-adaptive trait cone serotiny.

**Fig. S9** Parsimony reconstruction of fire-prone habitat.

**Fig. S10** Time tree of Cupressaceae estimated in BEAST from the combined cpDNA-nDNA dataset, calibrated with “*C. octothamna*” and constrained to nDNA topology.

**Fig. S11** Time tree of Cupressaceae estimated from the combined cpDNA-nDNA dataset, not calibrated with “*C. octothamna*” and not constrained to nDNA topology.

**Table S1** Taxa sampled, sample sources, their geographic origin and GenBank accession numbers for all sequences included in this study.

**Table S2** Loci sequenced, primers used for PCR and their design sources.

**Table S3** Molecular-clock calibrations.

**Table S4** Model comparisons using Bayes factors calculated from marginal likelihoods in BEAST.

**Table S5** Trait data: fossil morphology and fire-adaptive traits.

**Methods S1** Further details on assessment of previously unused fossils for calibration.

**Notes S1** References for Supporting Information.

**Fig. S1** Maximum likelihood phylogeny of the cpDNA dataset, estimated using a partitioned RAxML analysis. Bootstrap values  $\geq 70$  are shown at nodes.

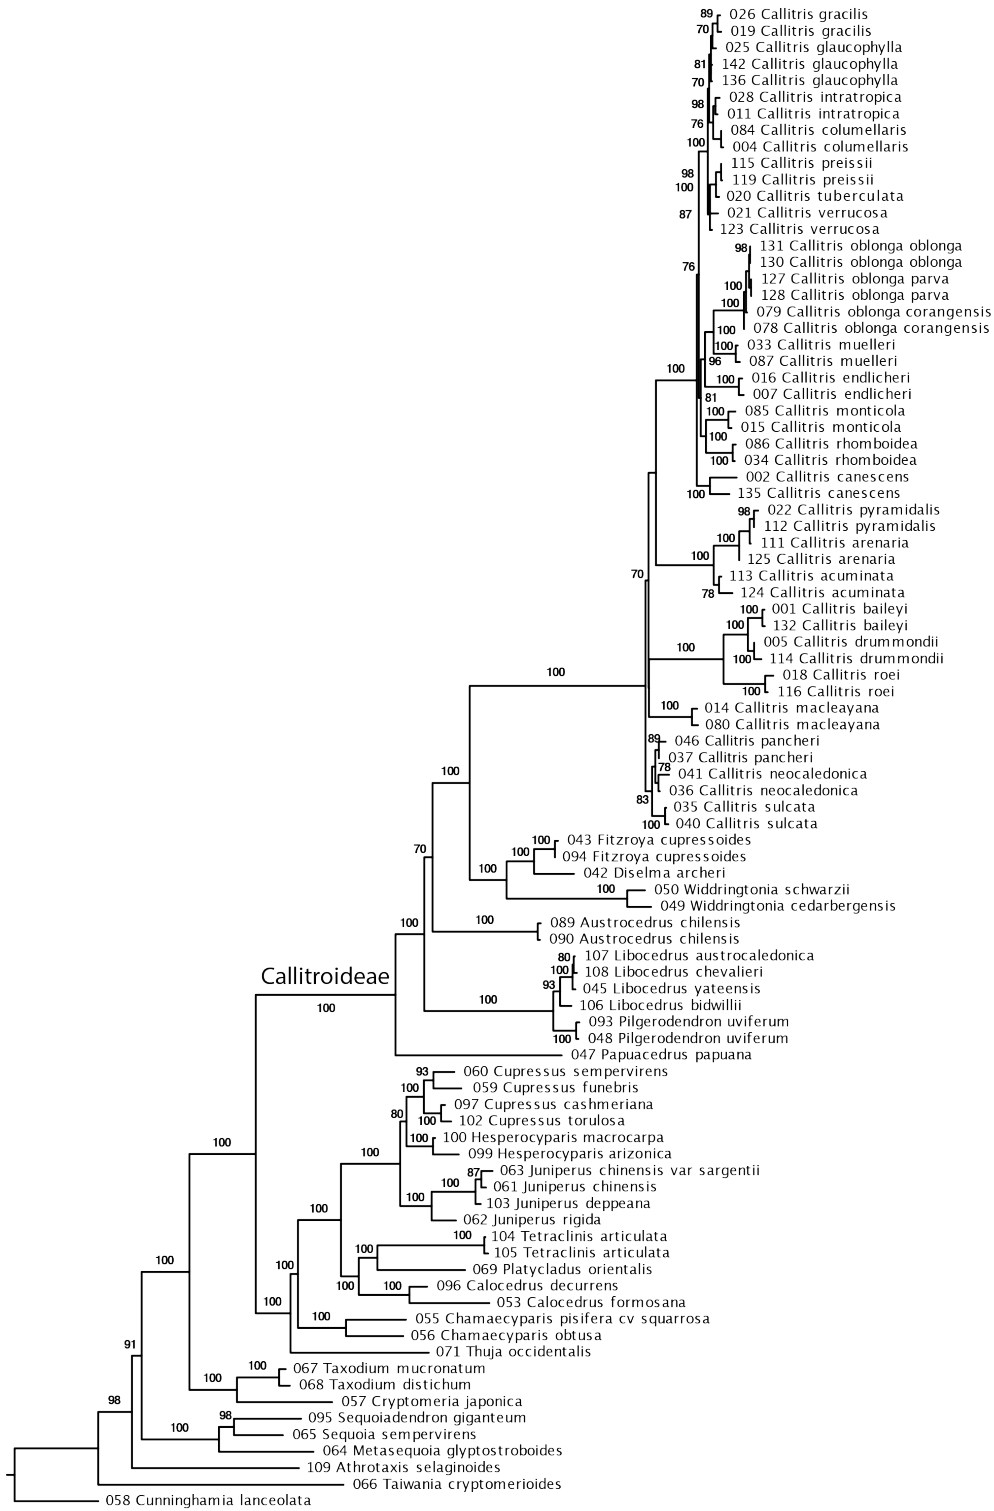

0.02

**Fig. S2** Maximum likelihood phylogeny of the nDNA dataset, estimated using an unpartitioned RAxML analysis. Bootstrap values  $\geq 70$  are shown at nodes. This tree is for Callitroideae only because sequences were not available for other Cupressaceae subfamilies.

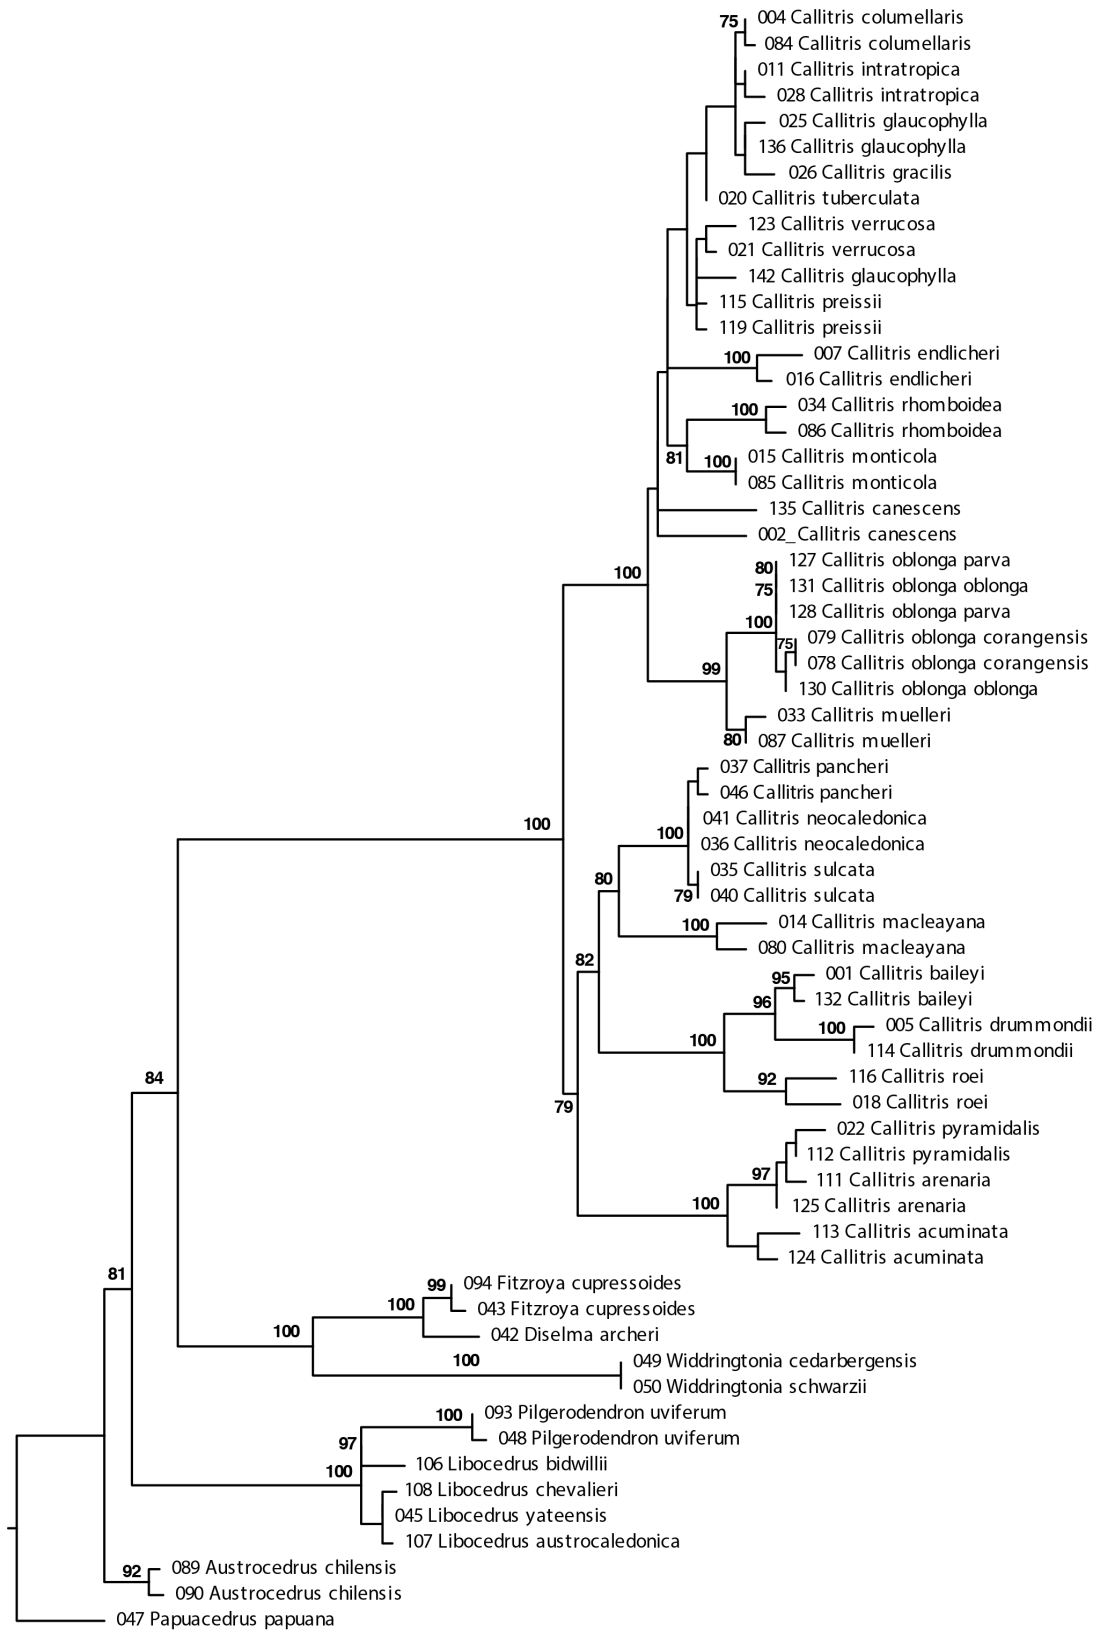

0.01

**Fig. S3** Maximum likelihood phylogeny of combined cpDNA and nDNA datasets, using a partitioned RAxML analysis. Bootstrap values  $\geq 70$  are shown at nodes. Numbered circles at nodes indicate fossil-based calibrations listed in Table S3. Alternative placements, or omission, of nos 10 and 11 (shown in black on white backgrounds) were tested using Bayes Factors—for details, see text. The double-headed arrow indicates an alternative relationship between *Austrocedrus* and *Libocedrus + Pilgerodendron*. This was supported by the nDNA dataset (Fig. S2) and was used as a topological constraint in BEAST analyses (see Methods and Results in main text).

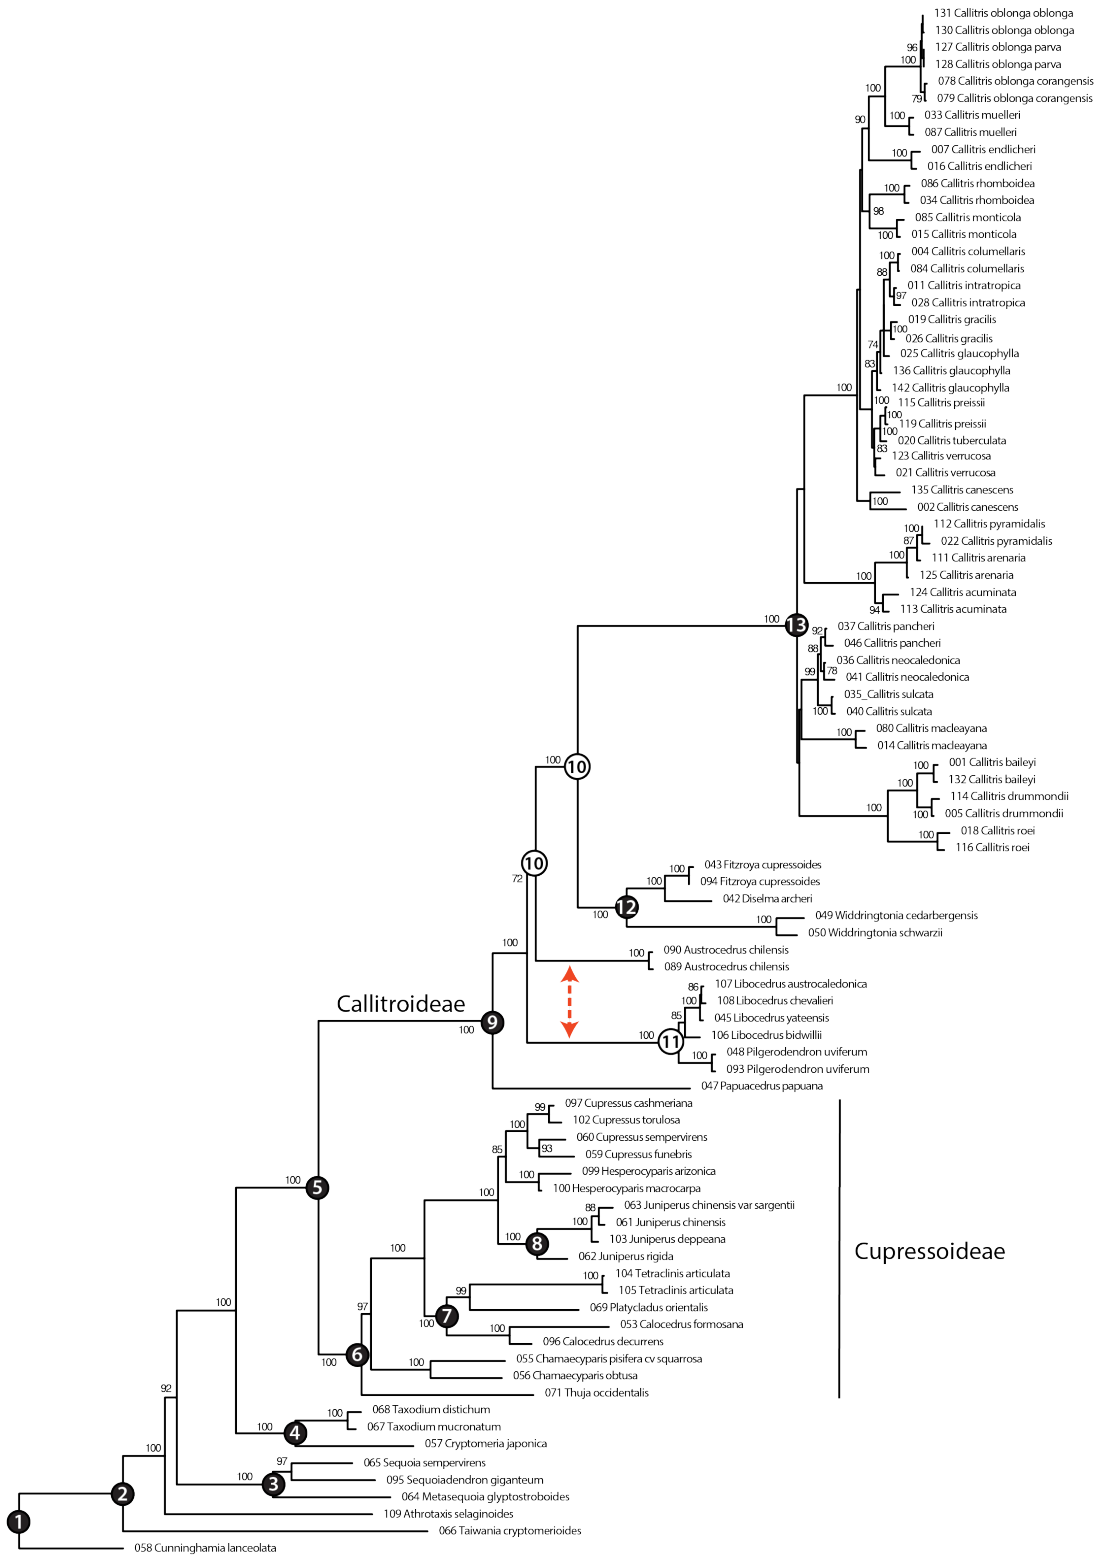

**Fig. S4** Alternative placements of the c. 100-Myr-old “*Callitris octothamna*” fossil for calibrating the BEAST analyses of Cupressaceae. Phyllotaxis is reconstructed on the tree using parsimony; maximum likelihood mapping gave essentially the same result. The fossil has ternate phyllotaxis (as in most extant *Callitris* species), which could have originated at either node A (the *Callitris* stem node) or node B (the MRCA of *Austrocedrus* and *Callitris*). This is calibration 10 in Fig. S3 and Bayes Factors preferred its placement at node B. The tree is pruned to show only subfamilies Callitroideae and Cupressoideae. Only the states judged ‘best’ under the ML-Mk1 model are shown on branches and are mapped as polymorphic on branches where their likelihoods are not significantly different.



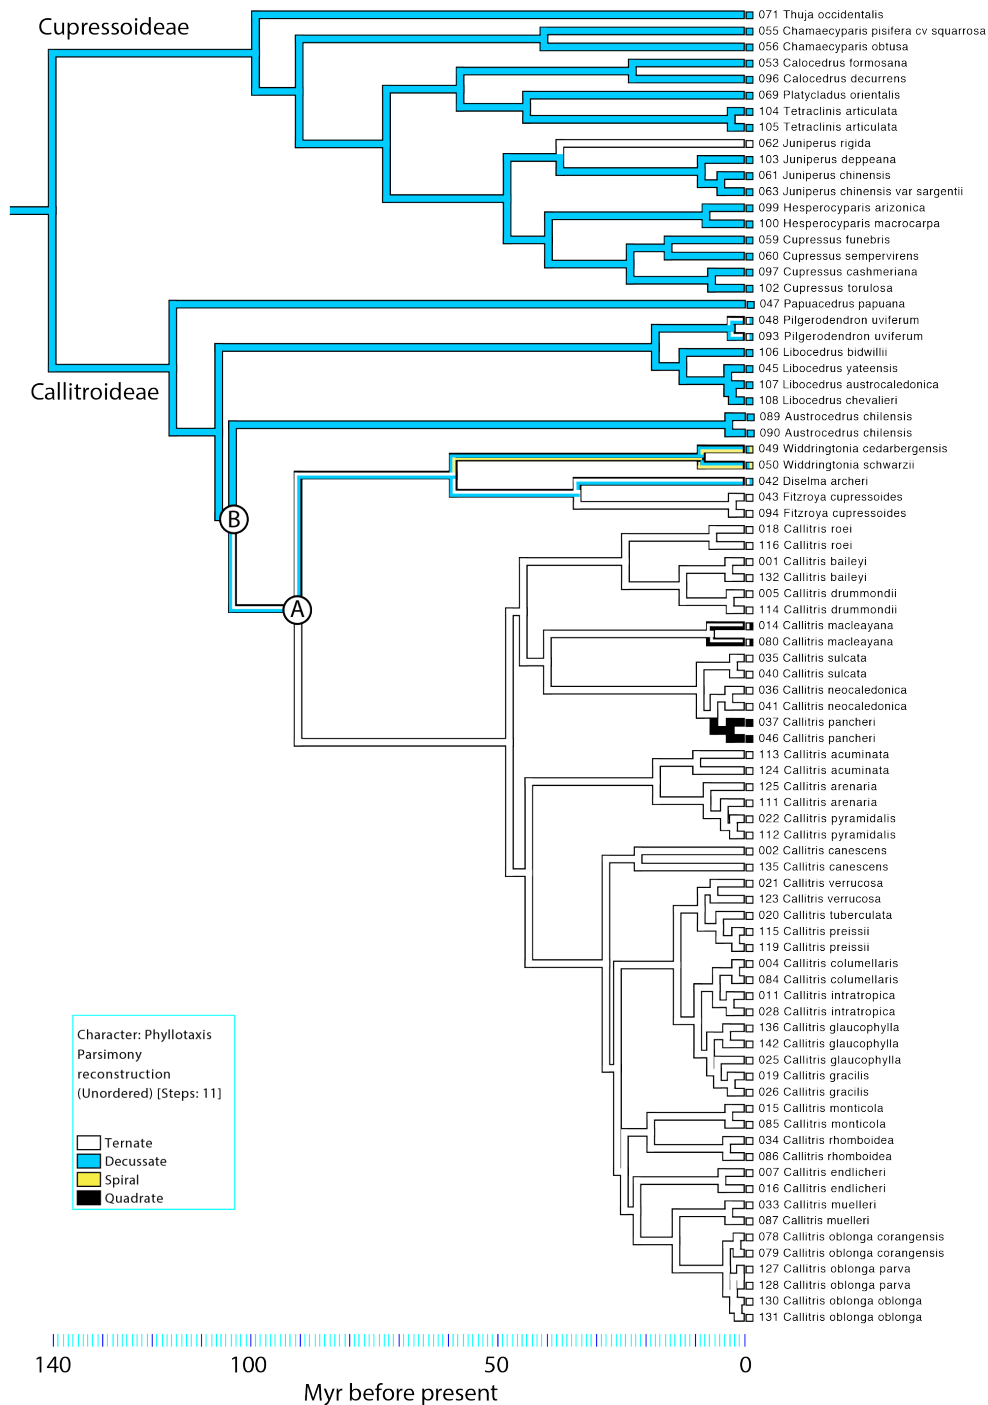

**Fig. S5** Alternative placements of the c. 100-Myr-old “*Callitris octothamna*” fossil for calibrating BEAST analysis of Cupressaceae. Leaf dimorphism and monomorphism are reconstructed on the tree using parsimony; maximum likelihood mapping gave essentially the same result. The fossil has monomorphic leaves, a state which is shared with the *Widdringtonia-Callitris* clade and is homoplasious in *Pilgerodendron* and the *Cupressus-Juniperus* clade. This is calibration 10 in Fig. S3 and Bayes Factors preferred its placement at node B. The tree is pruned to show only subfamilies Callitroideae and Cupressoideae.

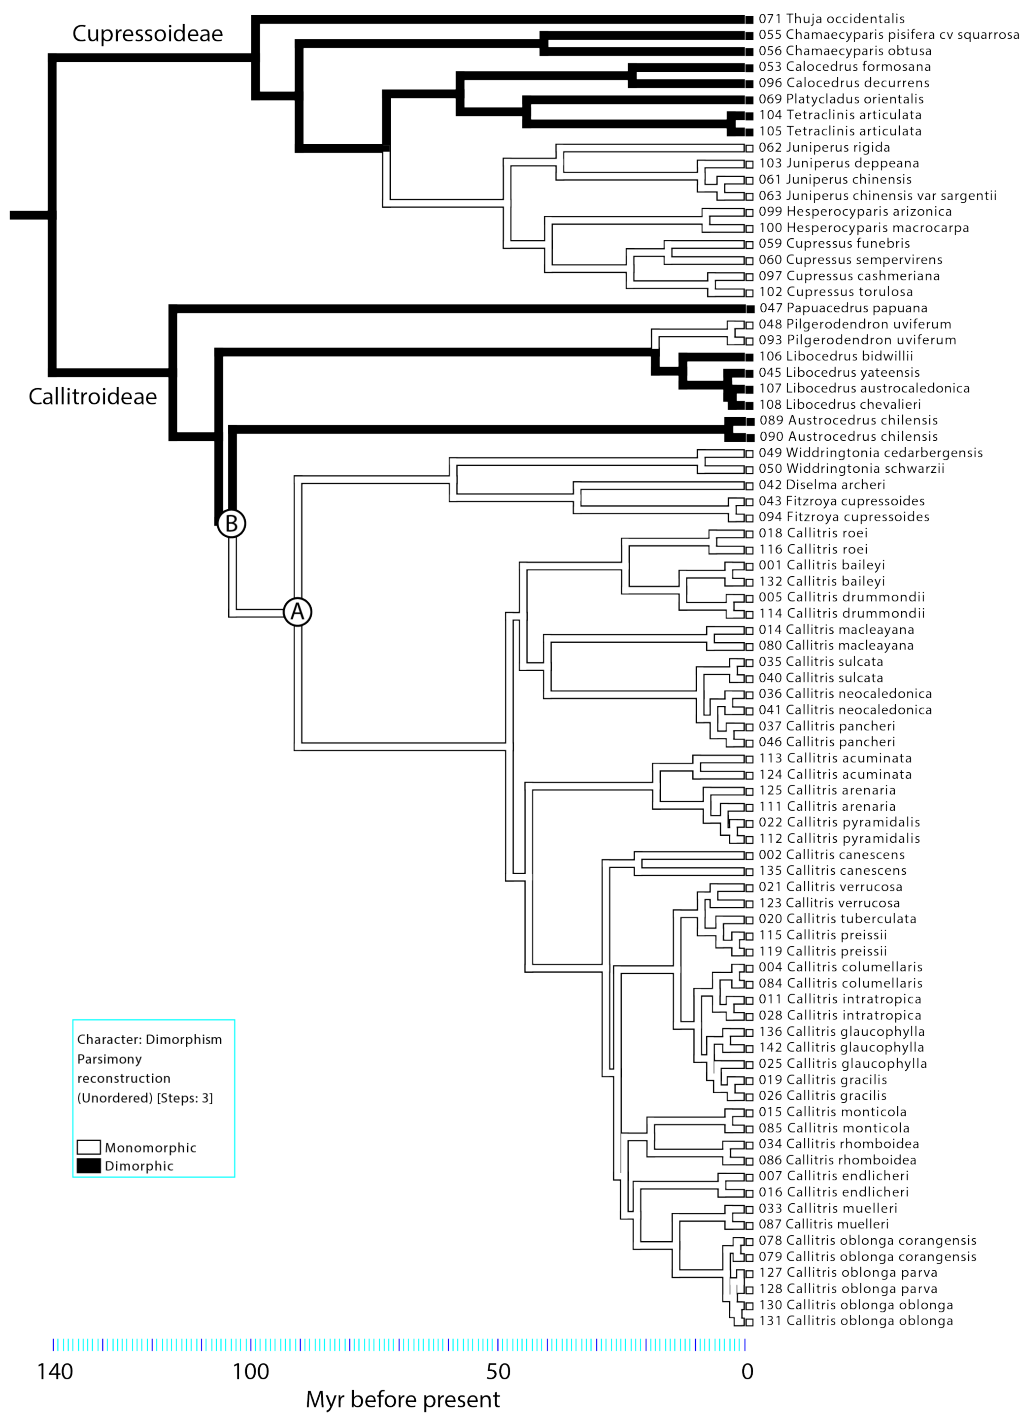

**Fig. S6** Alternative placements of the c. 100-Myr-old "*Callitris octothamna*" fossil for calibrating BEAST analysis of Cupressaceae. Cone-scale phyllotaxis is reconstructed on the tree using parsimony; maximum likelihood mapping gave essentially the same result. The fossil has two whorls of four scales, which is otherwise seen in paedomorphic extant *Callitris* species with quadrate leaves. Most *Callitris* species and some outgroups have two ternate whorls of cone scales. "*Callitris octothamna*" is unique in combining ternate leaves with quadrate cone scales; in all other known callitroids the cone-scales and leaf whorls have the same base number (2 or 3). Ternate cone scales could have originated at either node A (the *Callitris* stem node) or node B (the MRCA of *Austrocedrus* and *Callitris*). This is calibration 10 in Fig. S3 and Bayes Factors preferred its placement at node B. The tree is pruned to show only subfamilies Callitroideae and Cupressoideae. Only the states judged 'best' under the ML-Mk1 model are shown on branches and are mapped as polymorphic on branches where their likelihoods are not significantly different.

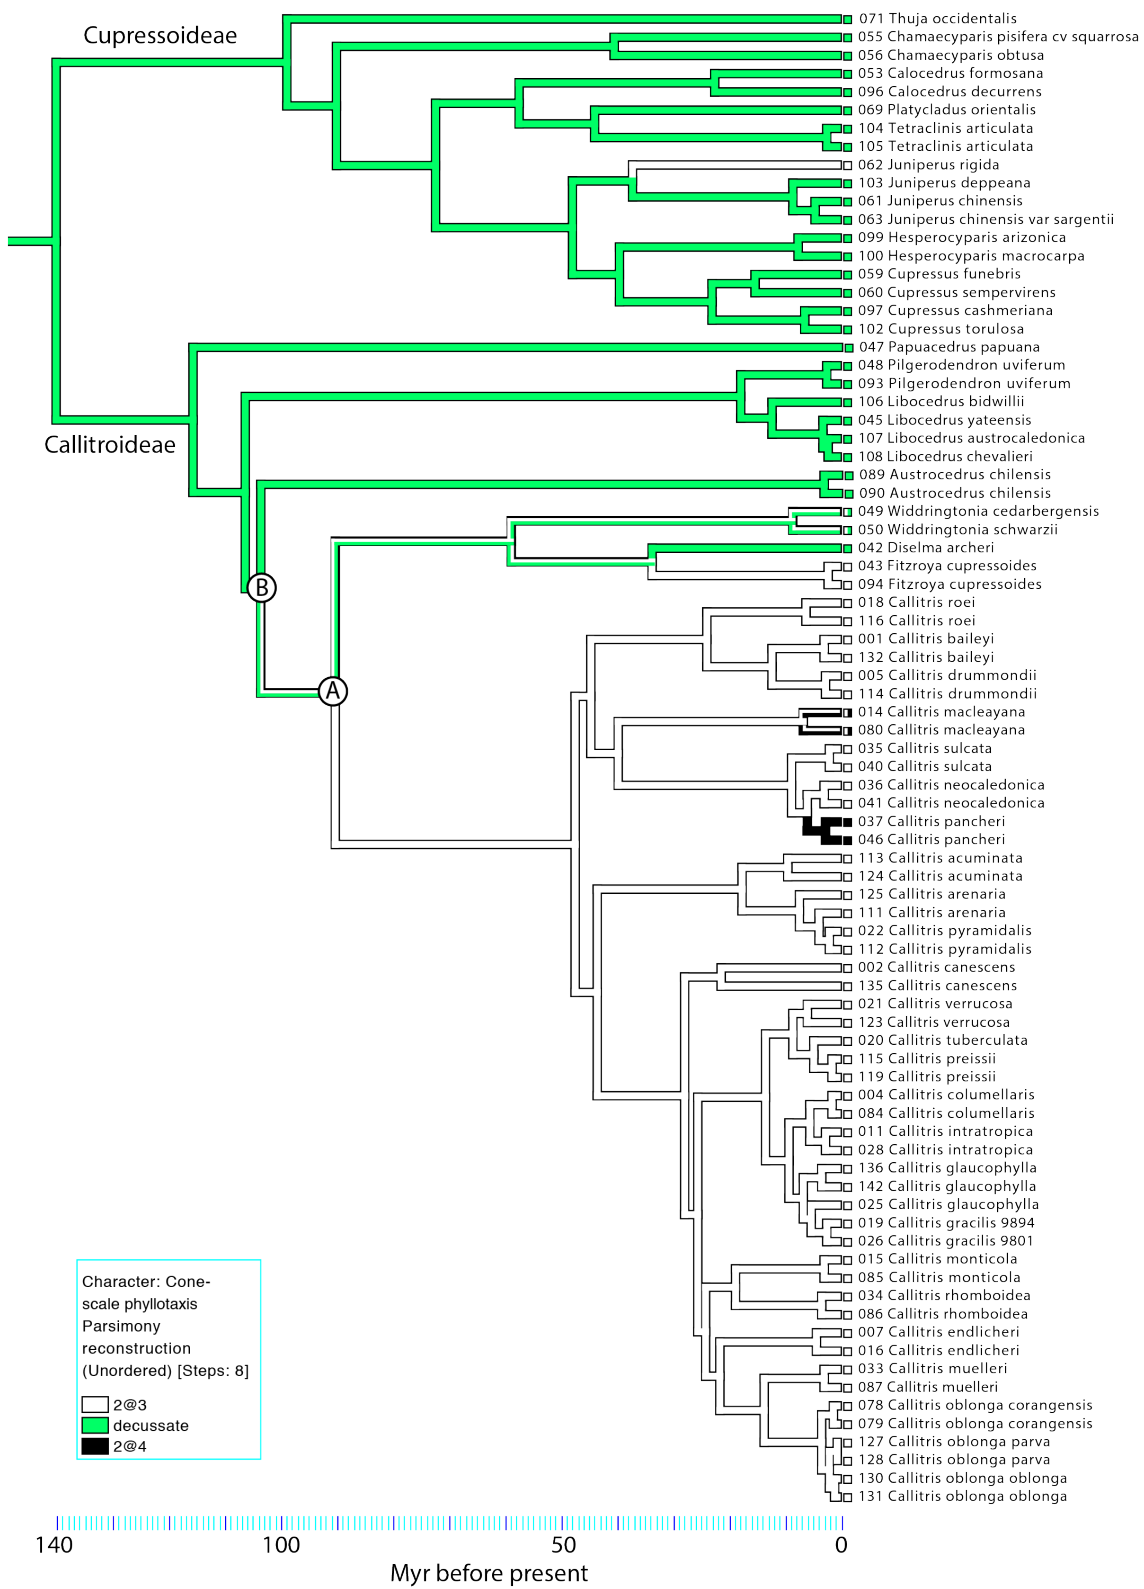

**Fig. S7** Time tree of Cupressaceae estimated from the combined cpDNA-nDNA dataset, using a partitioned BEAST analysis and calibrated using lognormal priors with all fossils shown in Fig. S3 except no. 11 (*Libocedrus mesibovii*). Posterior probabilities  $\geq 70$  are shown at nodes. Node bars indicate 95% HPD intervals of posterior divergence times. Node 10 was calibrated with the "*Callitris octothamna*" fossil but not given a monophyly constraint (contrast Fig. S10).

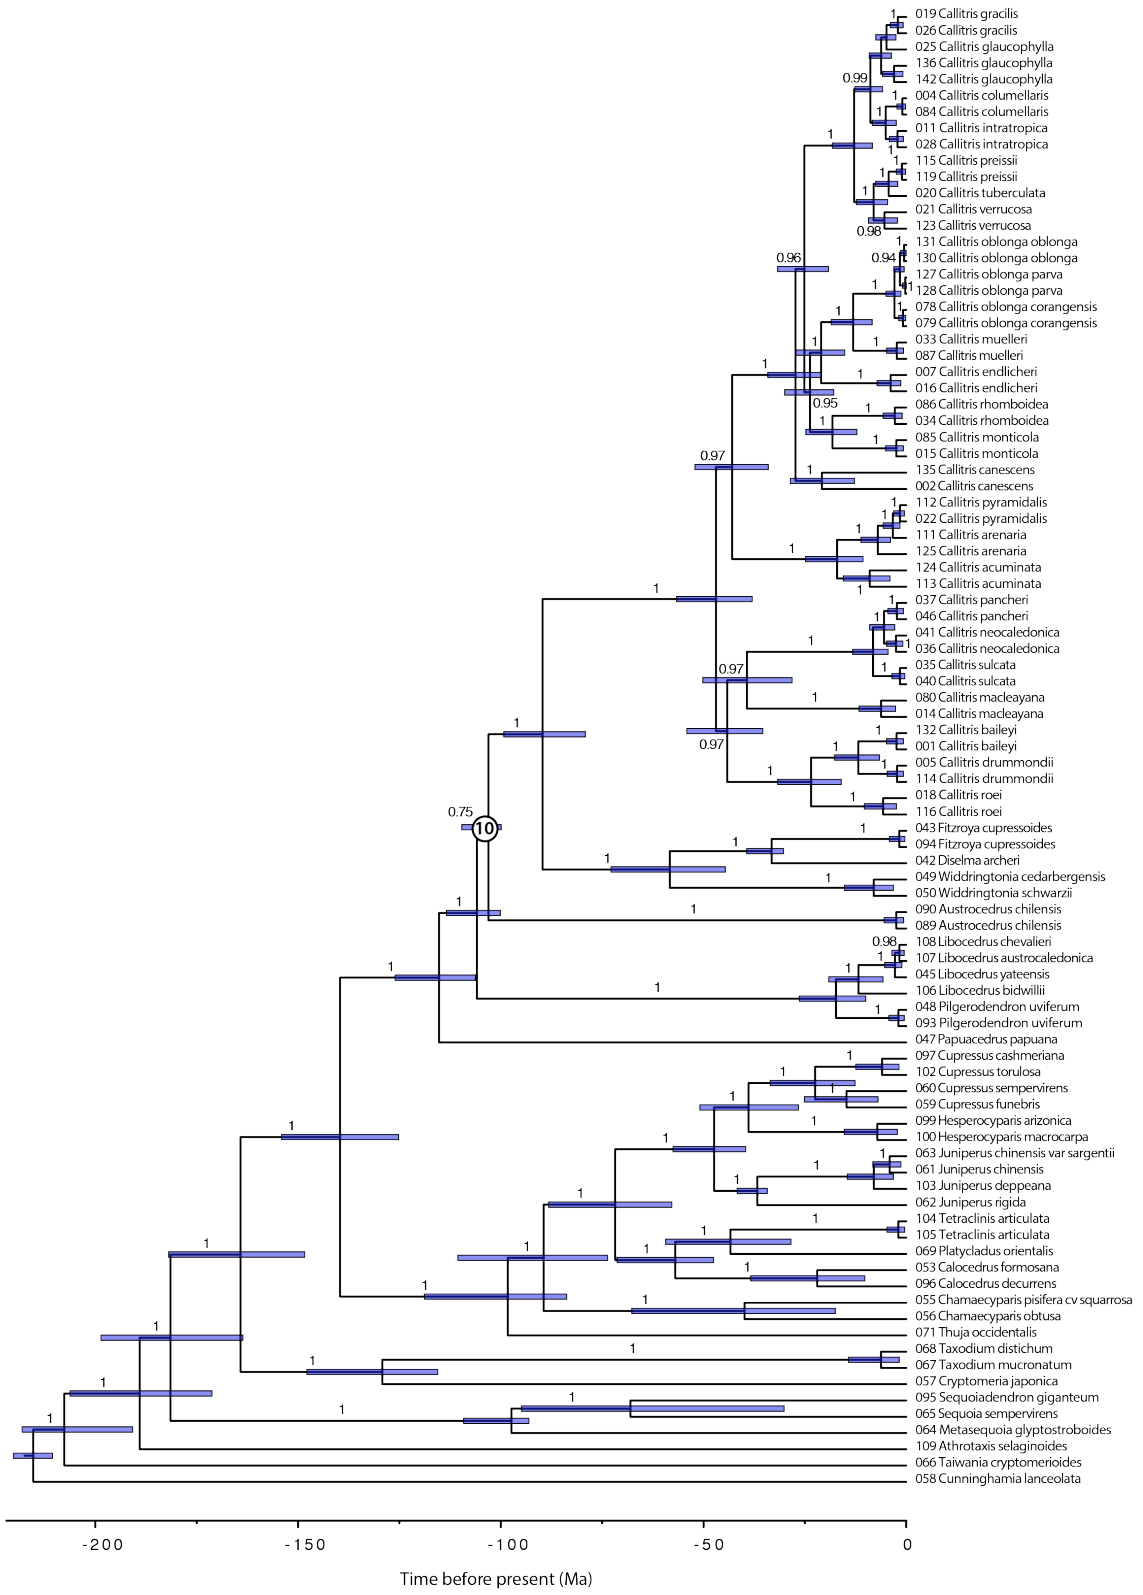

**Fig. S8** Parsimony reconstruction of the trait cone-serotiny. This tree was generated in BEAST with calibrations including "*Callitris octothamna*" at the MRCA of *Austrocedrus* and *Callitris*. The Tasmanian fossil *C. leaensis* has been inserted by hand mid-way along the stem-lineage of *Callitris*, with its branch terminating at c. 30 Ma, which is the age of the fossil. Grey shading indicates branches with ambiguous trait reconstruction. ML mapping gave essentially the same result.



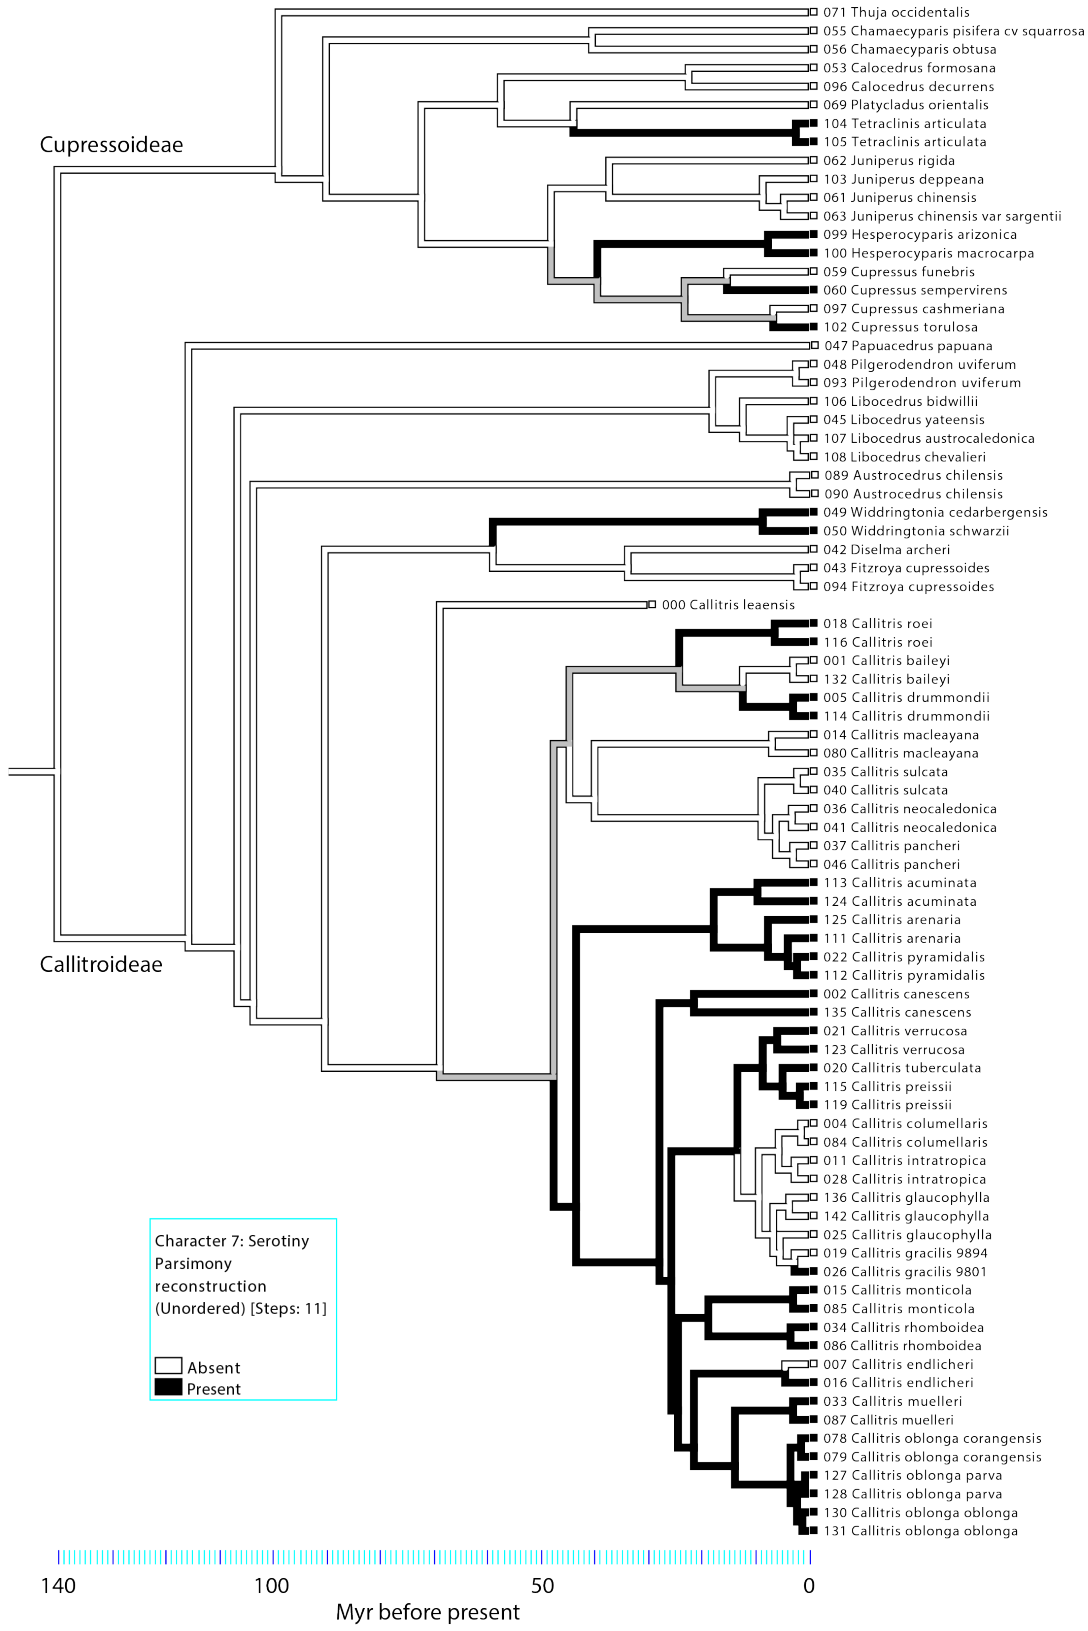

**Fig. S9** Parsimony reconstruction of the trait habitat fire-prone. This tree was generated in BEAST with calibrations including "*Callitris octothamna*" at the MRCA of *Austrocedrus* and *Callitris*. The Tasmanian fossil *C. leaensis* has been inserted by hand mid-way along the stem-lineage of *Callitris*, with its branch terminating at c. 30 Ma, which is the age of the fossil. ML mapping gave essentially the same result.

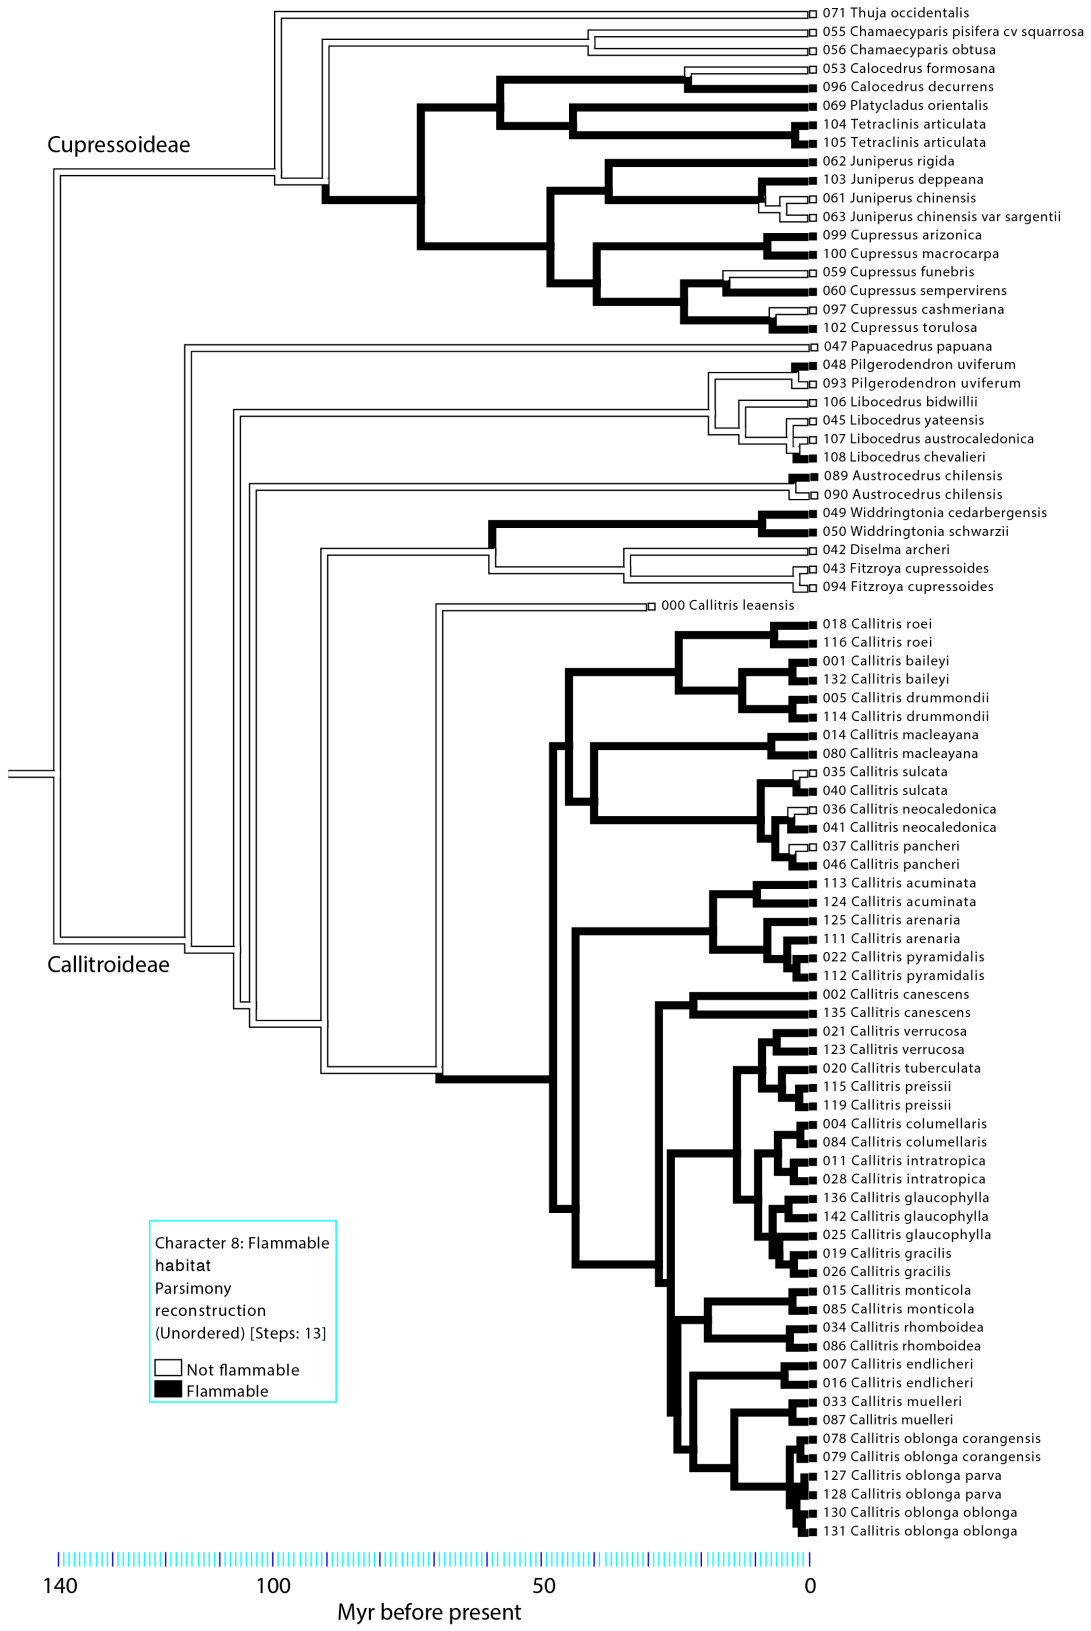

**Fig. S10** Time tree of Cupressaceae estimated from the combined cpDNA-nDNA dataset, using a partitioned BEAST analysis and calibrated using lognormal priors with all fossils shown in Fig. S3 except *Libocedrus* (11). Posterior probabilities  $\geq 70$  are shown at nodes. Node bars indicate 95% HPD intervals of posterior divergence times. The node numbered 10 (MRCA of *Pilgerodendron* and *Callitris*) was given a monophyly constraint in BEAST and calibrated with the “*Callitris octothamna*” fossil (contrast Fig. S7).

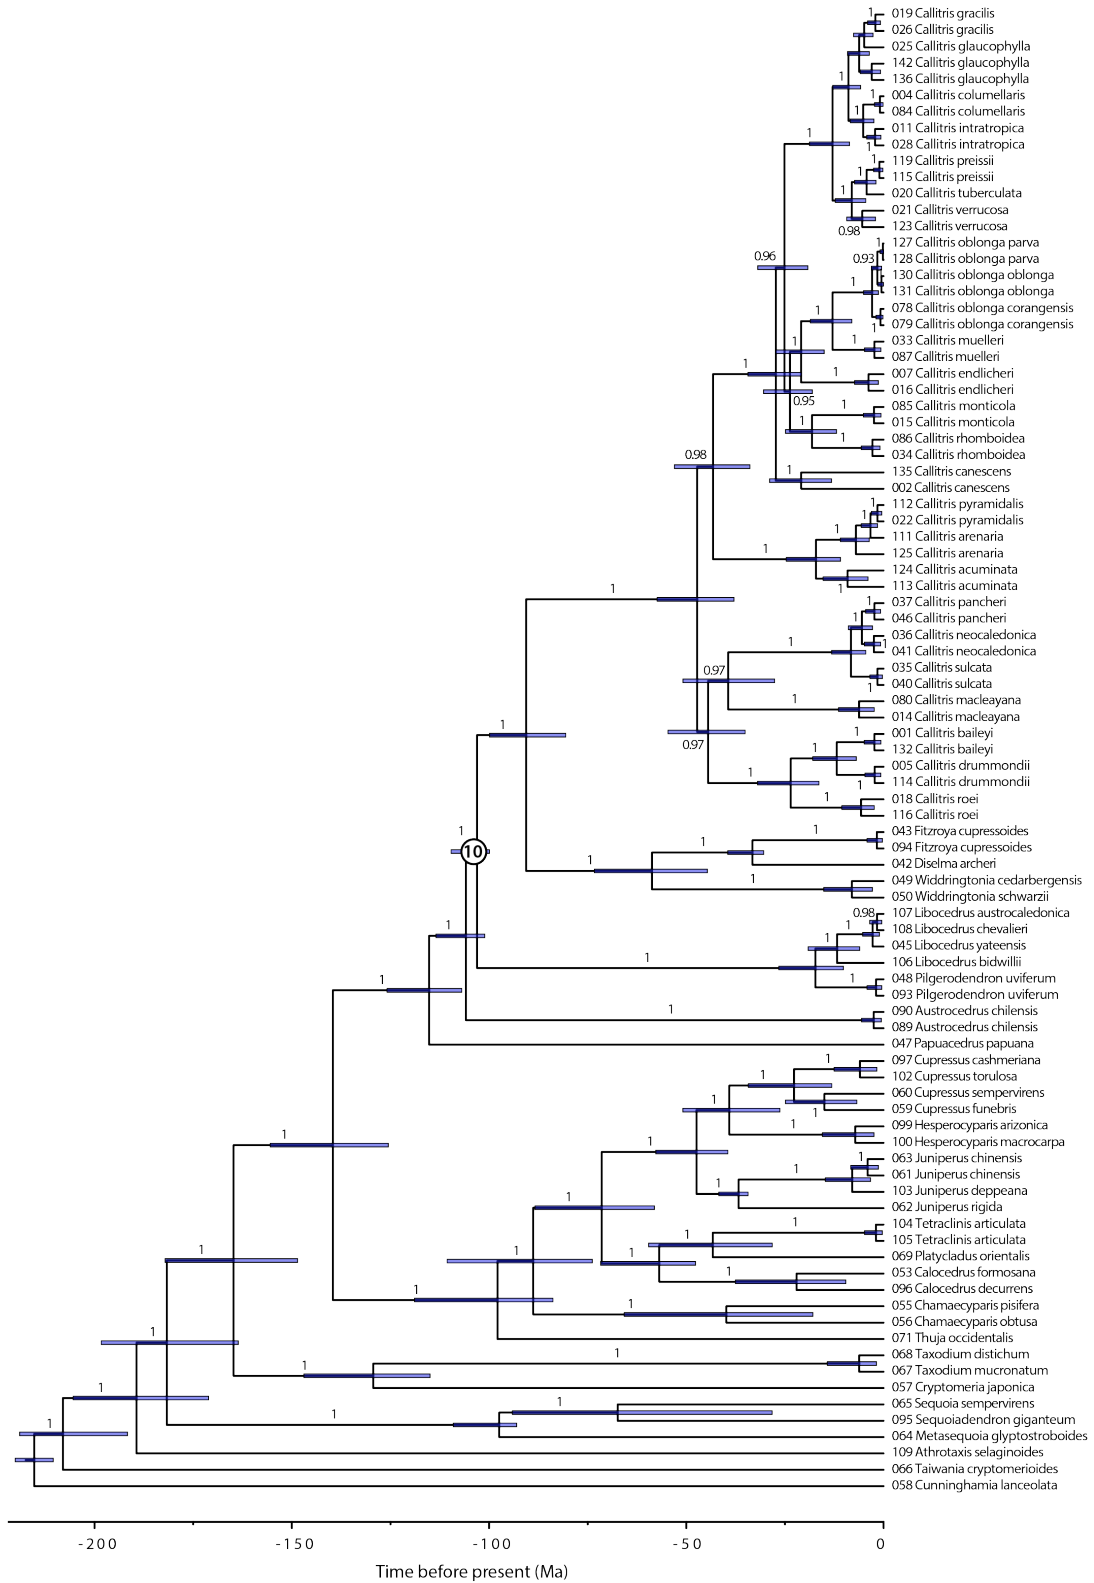

**Fig. S11** Time tree of Cupressaceae estimated from the combined cpDNA-nDNA dataset, using a partitioned BEAST analysis and calibrated (using lognormal priors) with all fossils shown in Fig. S3 except no. 11 (*Libocedrus mesibovii*) and “*Callitris octothamna*” (10). Posterior probabilities  $\geq 70$  are shown at nodes. Node bars indicate 95% HPD intervals of posterior divergence times. Node 10 was not given a monophyly constraint; note the relatively weak posterior probability (0.83).

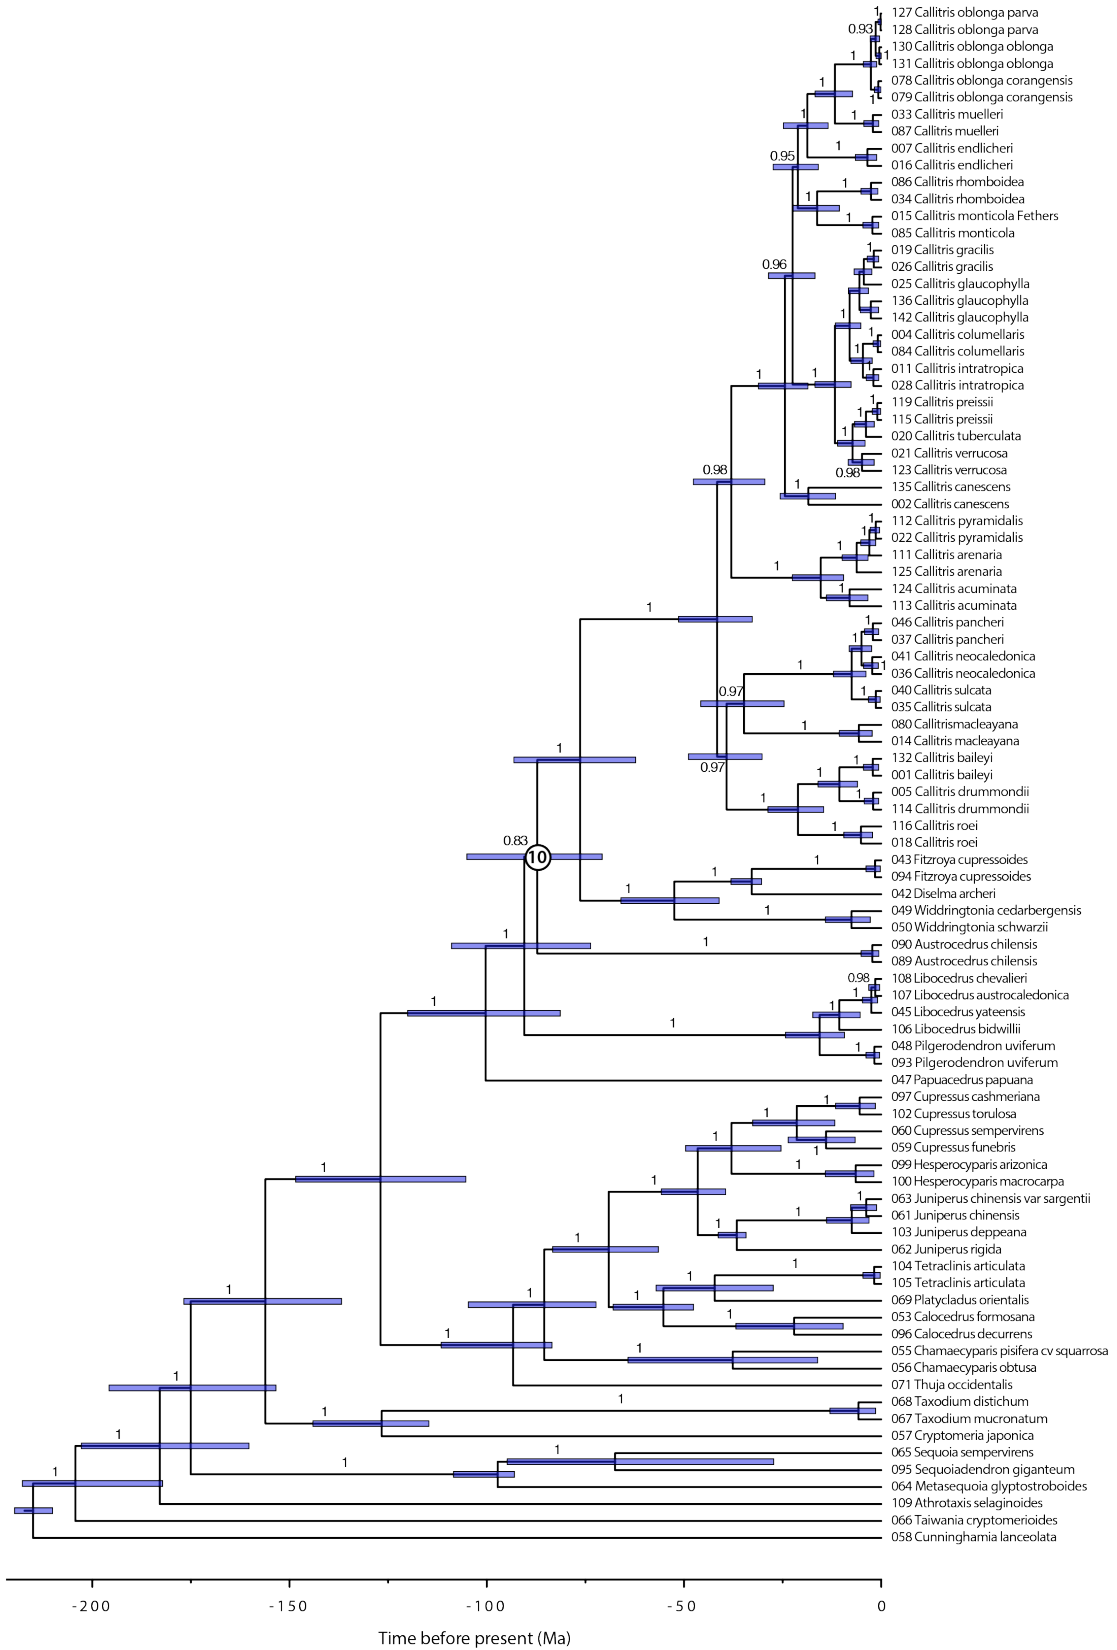





**Table S1** Taxa sampled, sample sources, their geographic origin and GenBank accession numbers of all sequences included in this study. All sequences were newly generated for this study. Taxonomy follows Hill (1998), Piggin & Bruhl (2010) and Byng (2015) for *Callitris* s.l. and Farjon (2005) and de Laubenfels et al. (2012) for the rest of Cupressaceae. Herbarium acronyms follow Index Herbariorum at <http://sciweb.nybg.org/science2/>. Crisp vouchers are all in CANB. Sources of some samples are detailed in Sakaguchi et al. (2013), as cited. Abbreviations of Australian states: NSW, New South Wales; NT, Northern Territory; Qld, Queensland; SA, South Australia; Tas, Tasmania; Vic, Victoria; WA, Western Australia.

---

**Part 1: Chloroplast DNA sequences**

---

| Taxon                                                     | Sample number, voucher (Herbarium) or source | Geographic origin | <i>rbcl</i> gene | <i>matK</i> gene | matK–trnK | rpl16    | psbH–psbB |
|-----------------------------------------------------------|----------------------------------------------|-------------------|------------------|------------------|-----------|----------|-----------|
| <b>Cupressaceae subfam.</b>                               |                                              |                   |                  |                  |           |          |           |
| <b>Callitroideae</b>                                      |                                              |                   |                  |                  |           |          |           |
| <i>Austrocedrus chilensis</i> (D.Don) Florin & Boutelje   | 089, Crisp 10667                             | Argentina         | LC405318         | LC404776         | LC404915  | LC405457 | LC405188  |
| <i>Callitris acuminata</i> (Parl.) F.Muell.               | 090, Crisp 10669                             | Argentina         | LC405319         | LC404777         | LC404916  | LC405458 | LC405189  |
|                                                           | 113, Crisp 10908                             | WA                | LC405340         | LC404798         | LC404938  | LC405481 | LC405212  |
|                                                           | 124, Crisp 11186                             | WA                | LC405351         | LC404809         | LC404949  | LC405492 | LC405223  |
| <i>C. arenaria</i> (C.A.Gardner) J.E.Piggin & J.J. Bruhl  | 111, Crisp 10803                             | WA                | LC405338         | LC404796         | LC404936  | LC405479 | LC405210  |
|                                                           | 125, Crisp 11187                             | WA                | LC405352         | LC404810         | LC404950  | LC405493 | LC405224  |
| <i>C. baileyi</i> C.T.White                               | 132, Crisp 11289A                            | Qld               | LC405359         | LC404817         | LC404957  | LC405500 | LC405231  |
|                                                           | 001, Crisp 10153A                            | Qld               | LC405243         | LC404698         | LC404829  | LC405371 | LC405110  |
| <i>C. canescens</i> (Parl.) S.T.Blake                     | 002, Crisp 10118                             | SA                | LC405244         | LC404699         | LC404830  | LC405372 | LC405111  |
|                                                           | 135, Crisp 9703                              | WA                | LC405362         | LC404820         | LC404960  | LC405503 | LC405234  |
| <i>C. columellaris</i> F.Muell.                           | 004, Crisp 10321                             | Qld               | LC405246         | LC404701         | LC404832  | LC405374 | LC405113  |
|                                                           | 084, Crisp 10703                             | NSW               | LC405313         | LC404771         | LC404910  | LC405452 | LC405183  |
| <i>C. drummondii</i> (Parl.) Benth. & Hook.f. ex F.Muell. | 114, Crisp 10998                             | WA                | LC405341         | LC404799         | LC404939  | LC405482 | LC405213  |
|                                                           | 005, Crisp 9945                              | WA                | LC405247         | LC404702         | LC404833  | LC405375 | LC405114  |

|                                                         |                                                                |               |          |          |          |          |          |
|---------------------------------------------------------|----------------------------------------------------------------|---------------|----------|----------|----------|----------|----------|
| <i>C. endlicheri</i> (Parl.) F.M.Bailey                 | 007, Crisp 10345                                               | Qld           | LC405249 | LC404704 | LC404835 | LC405377 | LC405116 |
|                                                         | 016, Crisp 10340                                               | Qld           | LC405258 | LC404713 | LC404844 | LC405386 | LC405125 |
| <i>C. glaucophylla</i> Joy Thomps. & L.A.S.Johnson      | 025, Crisp 9796                                                | NSW           | LC405265 | LC404720 | LC404851 | LC405393 | LC405132 |
|                                                         | 136, Central Australia, CA1-1 (Sakaguchi <i>et al.</i> , 2013) | NT            | LC405363 | LC404821 | LC404961 | LC405504 | LC405235 |
|                                                         | 142, WA3-1 (Sakaguchi <i>et al.</i> , 2013)                    | WA            | LC405369 | LC404827 | LC404967 | LC405510 | LC405241 |
| <i>C. gracilis</i> R.T.Baker                            | 026, Crisp 9801                                                | SA            | LC405266 | LC404721 | LC404852 | LC405394 | LC405133 |
|                                                         | 019, Crisp 9894                                                | WA            | LC405260 | LC404715 | LC404846 | LC405388 | LC405127 |
| <i>C. intratropica</i> R.T.Baker & H.G.Sm.              | 028, Crisp 9760                                                | NT            | LC405268 | LC404723 | LC404854 | LC405396 | LC405135 |
|                                                         | 011, Crisp 10221                                               | Qld           | LC405253 | LC404708 | LC404839 | LC405381 | LC405120 |
| <i>C. macleayana</i> (F.Muell.) F.Muell.                | 014, Crisp 10138                                               | NSW           | LC405256 | LC404711 | LC404842 | LC405384 | LC405123 |
|                                                         | 080, Mt Windsor 2 (Sakaguchi <i>et al.</i> , 2013)             | Qld           | LC405309 | LC404767 | LC404906 | LC405448 | LC405179 |
| <i>C. monticola</i> J.Garden                            | 085, Crisp 10707                                               | NSW           | LC405314 | LC404772 | LC404911 | LC405453 | LC405184 |
|                                                         | 015, Fethers 42 (CANB)                                         |               | LC405257 | LC404712 | LC404843 | LC405385 | LC405124 |
| <i>C. muelleri</i> (Parl.) Benth. & Hook.f. ex F.Muell. | 033, Beesley 281 (CANB)                                        | NSW           | LC405273 | LC404728 | LC404859 | LC405401 | LC405140 |
|                                                         | 087, Blue Mts B (Sakaguchi <i>et al.</i> , 2013)               | NSW           | LC405316 | LC404774 | LC404913 | LC405455 | LC405186 |
| <i>C. neocaledonica</i> Dümmer                          | 036, cult. University of Tasmania, UTAS1                       | New Caledonia | LC405276 | LC404731 | LC404862 | LC405404 | LC405143 |
|                                                         | 041, cult. University of Tasmania, UTAS2                       | New Caledonia | LC405280 | LC404736 | LC404867 | LC405409 | LC405148 |
| <i>C. oblonga</i> Rich. subsp. <i>oblonga</i>           | 130, TAS1-1                                                    | Tas           | LC405357 | LC404815 | LC404955 | LC405498 | LC405229 |
|                                                         | 131, TAS1-2                                                    | Tas           | LC405358 | LC404816 | LC404956 | LC405499 | LC405230 |
| <i>C. oblonga</i> subsp. <i>corangensis</i> K.D.Hill    | 078, Corang River 1, - 35.204, 150.051                         | NSW           | LC405307 | LC404765 | LC404904 | LC405446 | LC405177 |
|                                                         | 079, Corang River 2, - 35.204, 150.051                         | NSW           | LC405308 | LC404766 | LC404905 | LC405447 | LC405178 |
| <i>C. oblonga</i> Rich. subsp. <i>parva</i> K.D.Hill    | 127, Crisp 11285                                               | NSW           | LC405354 | LC404812 | LC404952 | LC405495 | LC405226 |
|                                                         | 128, Crisp 11286                                               | NSW           | LC405355 | LC404813 | LC404953 | LC405496 | LC405227 |
| <i>C. pancheri</i> (Carrière) Byng                      | 037, cult. University of Tasmania, UTAS1                       | New Caledonia | LC405277 | LC404732 | LC404863 | LC405405 | LC405144 |
|                                                         | 046, cult. University of                                       | New Caledonia | LC405285 | LC404741 | LC404872 | LC405414 | LC405153 |

|                                                       |                                                                     |               |                      |                      |                      |                      |                      |  |
|-------------------------------------------------------|---------------------------------------------------------------------|---------------|----------------------|----------------------|----------------------|----------------------|----------------------|--|
|                                                       | Tasmania, UTAS2                                                     |               |                      |                      |                      |                      |                      |  |
| <i>C. preissii</i> Miq.                               | 119, Crisp 10025                                                    | WA            | LC405346             | LC404804             | LC404944             | LC405487             | LC405218             |  |
|                                                       | 115, Crisp 11016                                                    | WA            | LC405342             | LC404800             | LC404940             | LC405483             | LC405214             |  |
| <i>C. pyramidalis</i> (Miq.) J.E.Piggin & J.J.Bruhl   | 022, Crisp 10009                                                    | WA            | LC405263             | LC404718             | LC404849             | LC405391             | LC405130             |  |
|                                                       | 112, Crisp 10881                                                    | WA            | LC405339             | LC404797             | LC404937             | LC405480             | LC405480             |  |
| <i>C. rhomboidea</i> R.Br. ex Rich. & A.Rich.         | 086, L. Prior, Blue Mts, tree A                                     | NSW           | LC405315             | LC404773             | LC404912             | LC405454             | LC405185             |  |
|                                                       | 034, cult. University of Tasmania, UTAS1                            |               | LC405274             | LC404729             | LC404860             | LC405402             | LC405141             |  |
| <i>C. roei</i> (Endl.) F.Muell.                       | 018, Crisp 9922                                                     | WA            | LC405259             | LC404714             | LC404845             | LC405387             | LC405126             |  |
|                                                       | 116, Crisp 11040                                                    | WA            | LC405343             | LC404801             | LC404941             | LC405484             | LC405215             |  |
| <i>C. sulcata</i> (Parl.) Schltr.                     | 035, cult. University of Tasmania, UTAS1                            | New Caledonia | LC405275             | LC404730             | LC404861             | LC405403             | LC405142             |  |
|                                                       | 040, cult. University of Tasmania, UTAS2                            | New Caledonia | LC405279             | LC404735             | LC404866             | LC405408             | LC405147             |  |
| <i>C. tuberculata</i> R.Br. ex R.T.Baker & H.G.Sm.    | 020, Crisp 9975                                                     | WA            | LC405261             | LC404716             | LC404847             | LC405389             | LC405128             |  |
| <i>C. verrucosa</i> (A.Cunn. ex Endl.) R.Br. ex Mirb. | 021, Crisp 9883                                                     | SA            | LC405262             | LC404717             | LC404848             | LC405390             | LC405129             |  |
| <i>Diselma archeri</i> Hook.f.                        | 123, L. Prior, Calder Hwy 5042, cult. University of Tasmania, UTAS1 | Vic<br>Tas    | LC405350<br>LC405281 | LC404808<br>LC404737 | LC404948<br>LC404868 | LC405491<br>LC405410 | LC405222<br>LC405149 |  |
| <i>Fitzroya cupressoides</i> (Molina) I.M.Johnst.     | 043, cult. University of Tasmania, UTAS1                            | Patagonia     | LC405282             | LC404738             | LC404869             | LC405411             | LC405150             |  |
|                                                       | 094, Crisp 10673                                                    | Argentina     | LC405322             | LC404780             | LC404920             | LC405462             | LC405193             |  |
| <i>Libocedrus austrocaledonica</i> Brongn. & Gris     | 107, cult. Royal Tasmanian Botanic Garden                           | New Caledonia | LC405334             | LC404792             | LC404932             | LC405475             | LC405206             |  |
| <i>L. bidwillii</i> Hook.f.                           | 106, cult. Royal Tasmanian Botanic Garden                           | New Zealand   | LC405333             | LC404791             | LC404931             | LC405474             | LC405474             |  |
| <i>L. chevalieri</i> J.Buchholz                       | 108, cult. Royal Tasmanian Botanic Garden                           | New Caledonia | LC405335             | LC404793             | LC404933             | LC405476             | LC405207             |  |
| <i>L. yateensis</i> Guillaumin                        | 045, cult. University of Tasmania, UTAS1                            | New Caledonia | LC405284             | LC404740             | LC404871             | LC405413             | LC405152             |  |
| <i>Papuacedrus papuana</i> (F. Muell.) H.L. Li        | 047, cult. University of Tasmania, UTAS1                            | New Guinea    | LC405286             | LC404742             | LC404873             | LC405415             | LC405154             |  |

|                                                |                                                              |              |          |          |          |          |          |
|------------------------------------------------|--------------------------------------------------------------|--------------|----------|----------|----------|----------|----------|
| <i>Pilgerodendron uviferum</i> (D. Don) Florin | 048, cult. University of Tasmania, UTAS1<br>093, Crisp 10672 | Argentina    | LC405287 | LC404743 | LC404874 | LC405416 | LC405155 |
|                                                |                                                              | Argentina    | LC405321 | LC404779 | LC404919 | LC405461 | LC405192 |
| <i>Widdringtonia cedarbergensis</i> J.A.Marsh  | 049, cult. University of Tasmania, UTAS1                     | South Africa | LC405288 | LC404744 | LC404875 | LC405417 | LC405156 |
| <i>W. schwarzii</i> (Marloth) Mast.            | 050, cult. University of Tasmania, UTAS1                     | South Africa | LC405289 | LC404745 | LC404876 | LC405418 | LC405157 |

---

**Cupressaceae subfam.**

**Cupressoideae**

|                                                     |                             |                           |          |          |          |          |          |
|-----------------------------------------------------|-----------------------------|---------------------------|----------|----------|----------|----------|----------|
| <i>Calocedrus decurrens</i> (Torr.) Florin          | 096, Crisp 10686            | USA, Mexico               | LC405324 | LC404782 | LC404922 | LC405464 | LC405195 |
| <i>C. formosana</i> (Florin) Florin                 | 053, cult. Kyoto University | Taiwan                    | LC405290 | LC404746 | LC404879 | LC405421 | LC405158 |
| <i>Chamaecyparis obtusa</i> (Siebold & Zucc.) Endl. | 056, cult. Kyoto University | Japan                     | LC405292 | LC404748 | LC404882 | LC405424 | LC405160 |
| <i>C. pisifera</i> (Siebold & Zucc.) Endl.          | 055, cult. Kyoto University | Japan                     | LC405291 | LC404747 | LC404881 | LC405423 | LC405159 |
| <i>Cupressus cashmeriana</i> Royle ex Carr.         | 097, Crisp 10687            | Himalayas                 | LC405325 | LC404783 | LC404923 | LC405465 | LC405196 |
| <i>C. funebris</i> Endl.                            | 059, cult. Kyoto University | China, Vietnam            | LC405295 | LC404751 | LC404885 | LC405427 | LC405163 |
| <i>C. sempervirens</i> L.                           | 060, cult. Kyoto University | Mediterranean             | LC405296 | LC404752 | LC404886 | LC405428 | LC405164 |
| <i>C. torulosa</i> D.Don ex Lamb.                   | 102, Crisp 10692            | Himalayas, China, Vietnam | LC405329 | LC404787 | LC404927 | LC405470 | LC405201 |
| <i>Hesperocyparis arizonica</i> (Greene) Bartel     | 099, Crisp 10689            | USA, Mexico               | LC405326 | LC404784 | LC404925 | LC405467 | LC405198 |
| <i>H. macrocarpa</i> (Hartw. ex Gordon) Bartel      | 100, Crisp 10690            | California                | LC405327 | LC404785 | LC404926 | LC405468 | LC405199 |
| <i>Juniperus chinensis</i> L.                       | 061, cult. Kyoto University | East Asia                 | LC405297 | LC404753 | LC404887 | LC405429 | LC405165 |
| <i>J. chinensis</i> var. <i>sargentii</i> A.Henry   | 063, cult. Kyoto University | Japan                     | LC405299 | LC404755 | LC404889 | LC405431 | LC405167 |
| <i>J. deppeana</i> Steud.                           | 103, Crisp 10693            | USA, Mexico               | LC405330 | LC404788 | LC404928 | LC405471 | LC405202 |
| <i>J. rigida</i> Siebold & Zucc.                    | 062, cult. Kyoto University | East Asia                 | LC405298 | LC404754 | LC404888 | LC405430 | LC405166 |
| <i>Platycladus orientalis</i> (L.) Franco           | 069, cult. Kyoto University | East Asia                 | LC405305 | LC404761 | LC404895 | LC405437 | LC405173 |
| <i>Tetraclinis articulata</i> (Vahl) Mast.          | 104, cult. UC Davis         | Mediterranean             | LC405331 | LC404789 | LC404929 | LC405472 | LC405203 |

|                                                        |                             |                   |          |          |          |          |          |
|--------------------------------------------------------|-----------------------------|-------------------|----------|----------|----------|----------|----------|
|                                                        | 105, cult. UC Davis         | Mediterranean     | LC405332 | LC404790 | LC404930 | LC405473 | LC405204 |
| <i>Thuja occidentalis</i> L.                           | 071, cult. Kyoto University | Canada, USA       | LC405306 | LC404763 | LC404897 | LC405439 | LC405175 |
| <b>Other Cupressaceae subfamilies</b>                  |                             |                   |          |          |          |          |          |
| <i>Athrotaxis selaginoides</i> D.Don                   | 109, Mt Read                | Tas               | LC405336 | LC404794 | LC404934 | LC405477 | LC405208 |
| <i>Cryptomeria japonica</i> (Thunb. ex L.f.) D.Don     | 057, cult. Kyoto University | China, Japan      | LC405293 | LC404749 | LC404883 | LC405425 | LC405161 |
| <i>Cunninghamia lanceolata</i> (Lamb.) Hook.           | 058, cult. Kyoto University | SE Asia           | LC405294 | LC404750 | LC404884 | LC405426 | LC405162 |
| <i>Metasequoia glyptostroboides</i> H.H.Hu & W.C.Cheng | 064, cult. Kyoto University | China             | LC405300 | LC404756 | LC404890 | LC405432 | LC405168 |
| <i>Sequoia sempervirens</i> (D. Don) Endl.             | 065, cult. Kyoto University | Western USA       | LC405301 | LC404757 | LC404891 | LC405433 | LC405169 |
| <i>Sequoiadendron giganteum</i> (Lindl.) J. Buchholz   | 095, Crisp 10685            | California        | LC405323 | LC404781 | LC404921 | LC405463 | LC405194 |
| <i>Taiwania cryptomeroides</i> Hayata                  | 066, cult. Kyoto University | Vietnam, Taiwan   | LC405302 | LC404758 | LC404892 | LC405434 | LC405170 |
| <i>Taxodium distichum</i> (L.) Rich.                   | 068, cult. Kyoto University | SE USA            | LC405304 | LC404760 | LC404894 | LC405436 | LC405172 |
| <i>T. mucronatum</i> Ten.                              | 067, cult. Kyoto University | Mexico, Guatemala | LC405303 | LC404759 | LC404893 | LC405435 | LC405171 |

## Part 2: Chloroplast DNA sequences (cont.)

| Taxon                                                   | Accession number, voucher or source (Herbarium) | Geographic origin | trnL–trnF | trnH–psbA | petG–trnP | trnC–trnD |
|---------------------------------------------------------|-------------------------------------------------|-------------------|-----------|-----------|-----------|-----------|
| <b>Cupressaceae subfam.</b>                             |                                                 |                   |           |           |           |           |
| <b>Callitroideae</b>                                    |                                                 |                   |           |           |           |           |
| <i>Austrocedrus chilensis</i> (D.Don) Florin & Boutelje | 089, Crisp 10667                                | Argentina         | LC405875  | LC405736  | LC405055  | LC405597  |
|                                                         | 090, Crisp 10669                                | Argentina         | LC405876  | LC405737  | LC405056  | LC405598  |
| <i>Callitris acuminata</i> (Parl.) F.Muell.             | 113, Crisp 10908                                | WA                | LC405899  | LC405760  | LC405079  | LC405620  |
|                                                         | 124, Crisp 11186                                | WA                | LC405910  | LC405771  | LC405090  | LC405631  |
| <i>C. arenaria</i> (C.A.Gardner) J.E.Piggin & J.J.Bruhl | 111, Crisp 10803                                | WA                | LC405897  | LC405758  | LC405077  | LC405618  |
|                                                         | 125, Crisp 11187                                | WA                | LC405911  | LC405772  | LC405091  | LC405632  |

|                                                           |                                                                |               |          |          |          |          |
|-----------------------------------------------------------|----------------------------------------------------------------|---------------|----------|----------|----------|----------|
| <i>C. baileyi</i> C.T.White                               | 132, Crisp 11289A                                              | Qld           | LC405918 | LC405779 | LC405098 | LC405639 |
|                                                           | 001, Crisp 10153A                                              | Qld           | LC405791 | LC405651 | LC404969 | LC405512 |
| <i>C. canescens</i> (Parl.) S.T.Blake                     | 002, Crisp 10118                                               | SA            | LC405792 | LC405652 | LC404970 | LC405513 |
|                                                           | 135, Crisp 9703                                                | WA            | LC405921 | LC405782 | LC405101 | LC405642 |
| <i>C. columellaris</i> F.Muell.                           | 004, Crisp 10321                                               | Qld           | LC405794 | LC405654 | LC404972 | LC405515 |
|                                                           | 084, Crisp 10703                                               | NSW           | LC405870 | LC405731 | LC405050 | LC405592 |
| <i>C. drummondii</i> (Parl.) Benth. & Hook.f. ex F.Muell. | 114, Crisp 10998                                               | WA            | LC405900 | LC405761 | LC405080 | LC405621 |
|                                                           | 005, Crisp 9945                                                | WA            | LC405795 | LC405655 | LC404973 | LC405516 |
| <i>C. endlicheri</i> (Parl.) F.M.Bailey                   | 007, Crisp 10345                                               | Qld           | LC405797 | LC405657 | LC404975 | LC405518 |
|                                                           | 016, Crisp 10340                                               | Qld           | LC405806 | LC405666 | LC404984 | LC405527 |
| <i>C. glaucophylla</i> Joy Thomps. & L.A.S.Johnson        | 025, Crisp 9796                                                | NSW           | LC405813 | LC405674 | LC404991 | LC405534 |
|                                                           | 136, Central Australia, CA1-1 (Sakaguchi <i>et al.</i> , 2013) | NT            | LC405922 | LC405783 | LC405102 | LC405643 |
|                                                           | 142, WA3-1 (Sakaguchi <i>et al.</i> , 2013)                    | WA            | LC405928 | LC405789 | LC405108 | LC405649 |
| <i>C. gracilis</i> R.T.Baker                              | 026, Crisp 9801                                                | SA            | LC405814 | LC405675 | LC404992 | LC405535 |
|                                                           | 019, Crisp 9894                                                | WA            | LC405808 | LC405668 | LC404986 | LC405529 |
| <i>C. intratropica</i> R.T.Baker & H.G.Sm.                | 028, Crisp 9760                                                | NT            | LC405816 | LC405677 | LC404994 | LC405537 |
| <i>C. macleayana</i> (F.Muell.) F.Muell.                  | 011, Crisp 10221                                               | Qld           | LC405801 | LC405661 | LC404979 | LC405522 |
|                                                           | 014, Crisp 10138                                               | NSW           | LC405804 | LC405664 | LC404982 | LC405525 |
|                                                           | 080, Mt Windsor 2, -16.28, 145.08                              | Qld           | LC405866 | LC405727 | LC405046 | LC405588 |
| <i>C. monticola</i> J.Garden                              | 085, Crisp 10707                                               | NSW           | LC405871 | LC405732 | LC405051 | LC405593 |
|                                                           | 015, Fethers 42 (CANB)                                         |               | LC405805 | LC405665 | LC404983 | LC405526 |
| <i>C. muelleri</i> (Parl.) Benth. & Hook.f. ex F.Muell.   | 033, Beesley 281 (CANB)                                        | NSW           | LC405821 | LC405682 | LC404999 | LC405542 |
|                                                           | 087, Blue Mts B (Sakaguchi <i>et al.</i> , 2013)               | NSW           | LC405873 | LC405734 | LC405053 | LC405595 |
| <i>C. neocaledonica</i> Dümmer                            | 036, cult. University of Tasmania, UTAS1                       | New Caledonia | LC405824 | LC405685 | LC405002 | LC405545 |
|                                                           | 041, cult. University of Tasmania, UTAS2                       | New Caledonia | LC405829 | LC405690 | LC405007 | LC405550 |
| <i>C. oblonga</i> Rich. subsp. <i>oblonga</i>             | 130, TAS1-1                                                    | Tas           | LC405916 | LC405777 | LC405096 | LC405637 |
|                                                           | 131, TAS1-2                                                    | Tas           | LC405917 | LC405778 | LC405097 | LC405638 |
| <i>C. oblonga</i> subsp. <i>corangensis</i>               | 078, Corang River 1, -                                         | NSW           | LC405864 | LC405725 | LC405044 | LC405586 |

|                                                          |                                                              |               |          |          |          |          |
|----------------------------------------------------------|--------------------------------------------------------------|---------------|----------|----------|----------|----------|
| K.D.Hill                                                 | 35.204, 150.051<br>079, Corang River 2, -<br>35.204, 150.051 | NSW           | LC405865 | LC405726 | LC405045 | LC405587 |
| <i>C. oblonga</i> Rich. subsp. <i>parva</i><br>K.D.Hill  | 127, Crisp 11285                                             | NSW           | LC405913 | LC405774 | LC405093 | LC405634 |
|                                                          | 128, Crisp 11286                                             | NSW           | LC405914 | LC405775 | LC405094 | LC405635 |
| <i>C. pancheri</i> (Carrière) Byng                       | 037, cult. University of<br>Tasmania, UTAS1                  | New Caledonia | LC405825 | LC405686 | LC405003 | LC405546 |
|                                                          | 046, cult. University of<br>Tasmania, UTAS2                  | New Caledonia | LC405834 | LC405695 | LC405012 | LC405555 |
| <i>C. preissii</i> Miq.                                  | 119, Crisp 10025                                             | WA            | LC405905 | LC405766 | LC405085 | LC405626 |
|                                                          | 115, Crisp 11016                                             | WA            | LC405901 | LC405762 | LC405081 | LC405622 |
| <i>C. pyramidalis</i> (Miq.) J.E.Piggin &<br>J.J.Bruhl   | 022, Crisp 10009                                             | WA            | LC405811 | LC405671 | LC404989 | LC405532 |
|                                                          | 112, Crisp 10881                                             | WA            | LC405898 | LC405759 | LC405078 | LC405619 |
| <i>C. rhomboidea</i> R.Br. ex Rich. &<br>A.Rich.         | 086, L. Prior, Blue Mts, tree<br>A                           | NSW           | LC405872 | LC405733 | LC405052 | LC405594 |
|                                                          | 034, cult. University of<br>Tasmania, UTAS1                  |               | LC405822 | LC405683 | LC405000 | LC405543 |
| <i>C. roei</i> (Endl.) F.Muell.                          | 018, Crisp 9922                                              | WA            | LC405807 | LC405667 | LC404985 | LC405528 |
|                                                          | 116, Crisp 11040                                             | WA            | LC405902 | LC405763 | LC405082 | LC405623 |
| <i>C. sulcata</i> (Parl.) Schltr.                        | 035, cult. University of<br>Tasmania, UTAS1                  | New Caledonia | LC405823 | LC405684 | LC405001 | LC405544 |
|                                                          | 040, cult. University of<br>Tasmania, UTAS2                  | New Caledonia | LC405828 | LC405689 | LC405006 | LC405549 |
| <i>C. tuberculata</i> R.Br. ex R.T.Baker<br>& H.G.Sm.    | 020, Crisp 9975                                              | WA            | LC405809 | LC405669 | LC404987 | LC405530 |
| <i>C. verrucosa</i> (A.Cunn. ex Endl.)<br>R.Br. ex Mirb. | 021, Crisp 9883                                              | SA            | LC405810 | LC405670 | LC404988 | LC405531 |
|                                                          | 123, L. Prior, Calder Hwy 5                                  | Vic           | LC405909 | LC405770 | LC405089 | LC405630 |
| <i>Diselma archeri</i> Hook.f.                           | 042, cult. University of<br>Tasmania, UTAS1                  | Tas           | LC405830 | LC405691 | LC405008 | LC405551 |
| <i>Fitzroya cupressoides</i> (Molina)<br>I.M.Johnst.     | 043, cult. University of<br>Tasmania, UTAS1                  | Patagonia     | LC405831 | LC405692 | LC405009 | LC405552 |
|                                                          | 094, Crisp 10673                                             | Argentina     | LC405880 | LC405741 | LC405060 | LC405601 |
| <i>Libocedrus austrocaledonica</i><br>Brongn. & Gris     | 107, cult. Royal Tasmanian<br>Botanic Garden                 | New Caledonia | LC405893 | LC405754 | LC405073 | LC405614 |

|                                                |                                           |               |          |          |          |          |
|------------------------------------------------|-------------------------------------------|---------------|----------|----------|----------|----------|
| <i>L. bidwillii</i> Hook.f.                    | 106, cult. Royal Tasmanian Botanic Garden | New Zealand   | LC405892 | LC405753 | LC405072 | LC405613 |
| <i>L. chevalieri</i> J.Buchholz                | 108, cult. Royal Tasmanian Botanic Garden | New Caledonia | LC405894 | LC405755 | LC405074 | LC405615 |
| <i>L. yateensis</i> Guillaumin                 | 045, cult. University of Tasmania, UTAS1  | New Caledonia | LC405833 | LC405694 | LC405011 | LC405554 |
| <i>Papuacedrus papuana</i> (F. Muell.) H.L. Li | 047, cult. University of Tasmania, UTAS1  | New Guinea    | LC405835 | LC405696 | LC405013 | LC405556 |
| <i>Pilgerodendron uviferum</i> (D. Don) Florin | 048, cult. University of Tasmania, UTAS1  | Argentina     | LC405836 | LC405697 | LC405014 | LC405557 |
| <i>Widdringtonia cedarbergensis</i> J.A.Marsh  | 093, Crisp 10672                          | Argentina     | LC405879 | LC405740 | LC405059 | LC405600 |
| <i>W. schwarzii</i> (Marloth) Mast.            | 049, cult. University of Tasmania, UTAS1  | South Africa  | LC405837 | LC405698 | LC405015 | LC405558 |
|                                                | 050, cult. University of Tasmania, UTAS1  | South Africa  | LC405838 | LC405699 | LC405016 | LC405559 |

---

**Cupressaceae subfam.**

**Cupressoideae**

|                                                     |                             |                           |          |          |          |          |
|-----------------------------------------------------|-----------------------------|---------------------------|----------|----------|----------|----------|
| <i>Calocedrus decurrens</i> (Torr.) Florin          | 096, Crisp 10686            | USA, Mexico               | LC405882 | LC405743 | LC405062 | LC405603 |
| <i>C. formosana</i> (Florin) Florin                 | 053, cult. Kyoto University | Taiwan                    | LC405841 | LC405702 | LC405019 | LC405562 |
| <i>Chamaecyparis obtusa</i> (Siebold & Zucc.) Endl. | 056, cult. Kyoto University | Japan                     | LC405844 | LC405705 | LC405022 | LC405565 |
| <i>C. pisifera</i> (Siebold & Zucc.) Endl.          | 055, cult. Kyoto University | Japan                     | LC405843 | LC405704 | LC405021 | LC405564 |
| <i>Cupressus cashmeriana</i> Royle ex Carr.         | 097, Crisp 10687            | Himalayas                 | LC405883 | LC405744 | LC405063 | LC405604 |
| <i>C. funebris</i> Endl.                            | 059, cult. Kyoto University | China, Vietnam            | LC405847 | LC405708 | LC405025 | LC405568 |
| <i>C. sempervirens</i> L.                           | 060, cult. Kyoto University | Mediterranean             | LC405848 | LC405709 | LC405026 | LC405569 |
| <i>C. torulosa</i> D.Don ex Lamb.                   | 102, Crisp 10692            | Himalayas, China, Vietnam | LC405888 | LC405749 | LC405068 | LC405609 |
| <i>Hesperocyparis arizonica</i> (Greene) Bartel     | 099, Crisp 10689            | USA, Mexico               | LC405885 | LC405746 | LC405065 | LC405606 |
| <i>H. macrocarpa</i> (Hartw. ex Gordon) Bartel      | 100, Crisp 10690            | California                | LC405886 | LC405747 | LC405066 | LC405607 |
| <i>Juniperus chinensis</i> L.                       | 061, cult. Kyoto University | East Asia                 | LC405849 | LC405710 | LC405027 | LC405570 |
| <i>J. chinensis</i> var. <i>sargentii</i> A.Henry   | 063, cult. Kyoto University | Japan                     | LC405851 | LC405712 | LC405029 | LC405572 |



|                                                        |                             |                   |          |          |          |          |
|--------------------------------------------------------|-----------------------------|-------------------|----------|----------|----------|----------|
| <i>J. deppeana</i> Steud.                              | 103, Crisp 10693            | USA, Mexico       | LC405889 | LC405750 | LC405069 | LC405610 |
| <i>J. rigida</i> Siebold & Zucc.                       | 062, cult. Kyoto University | East Asia         | LC405850 | LC405711 | LC405028 | LC405571 |
| <i>Platycladus orientalis</i> (L.) Franco              | 069, cult. Kyoto University | East Asia         | LC405857 | LC405718 | LC405035 | LC405578 |
| <i>Tetraclinis articulata</i> (Vahl) Mast.             | 104, cult. UC Davis         | Mediterranean     | LC405890 | LC405751 | LC405070 | LC405611 |
|                                                        | 105, cult. UC Davis         | Mediterranean     | LC405891 | LC405752 | LC405071 | LC405612 |
| <i>Thuja occidentalis</i> L.                           | 071, cult. Kyoto University | Canada, USA       | LC405858 | LC405720 | LC405037 | LC405580 |
| <b>Other Cupressaceae subfamilies</b>                  |                             |                   |          |          |          |          |
| <i>Athrotaxis selaginoides</i> D.Don                   | 109, Mt Read                | Tas               | LC405895 | LC405756 | LC405075 | LC405616 |
| <i>Cryptomeria japonica</i> (Thunb. ex L.f.) D.Don     | 057, cult. Kyoto University | China, Japan      | LC405845 | LC405706 | LC405023 | LC405566 |
| <i>Cunninghamia lanceolata</i> (Lamb.) Hook.           | 058, cult. Kyoto University | SE Asia           | LC405846 | LC405707 | LC405024 | LC405567 |
| <i>Metasequoia glyptostroboides</i> H.H.Hu & W.C.Cheng | 064, cult. Kyoto University | China             | LC405852 | LC405713 | LC405030 | LC405573 |
| <i>Sequoia sempervirens</i> (D. Don) Endl.             | 065, cult. Kyoto University | Western USA       | LC405853 | LC405714 | LC405031 | LC405574 |
| <i>Sequoiadendron giganteum</i> (Lindl.) J. Buchholz   | 095, Crisp 10685            | California        | LC405881 | LC405742 | LC405061 | LC405602 |
| <i>Taiwania cryptomeroides</i> Hayata                  | 066, cult. Kyoto University | Vietnam, Taiwan   | LC405854 | LC405715 | LC405032 | LC405575 |
| <i>Taxodium distichum</i> (L.) Rich.                   | 068, cult. Kyoto University | SE USA            | LC405856 | LC405717 | LC405034 | LC405577 |
| <i>T. mucronatum</i> Ten.                              | 067, cult. Kyoto University | Mexico, Guatemala | LC405855 | LC405716 | LC405033 | LC405576 |

---

### Part 3: Nuclear DNA sequences

| Taxon                                                   | Accession number, voucher or source (Herbarium) | Geographic origin | c257     | c22306   | c36749   |
|---------------------------------------------------------|-------------------------------------------------|-------------------|----------|----------|----------|
| <b>Cupressaceae subfam.</b>                             |                                                 |                   |          |          |          |
| <b>Callitroideae</b>                                    |                                                 |                   |          |          |          |
| <i>Austrocedrus chilensis</i> (D.Don) Florin & Boutelje | 089, Crisp 10667                                | Argentina         | LC404568 | LC404474 | LC404661 |

|                                                              |                                                                   |           |          |          |          |
|--------------------------------------------------------------|-------------------------------------------------------------------|-----------|----------|----------|----------|
|                                                              | 090, Crisp 10669                                                  | Argentina | LC404569 | LC404475 | -        |
| <i>Callitris acuminata</i> (Parl.) F.Muell.                  | 113, Crisp 10908                                                  | WA        | LC404579 | -        | -        |
|                                                              | 124, Crisp 11186                                                  | WA        | LC404590 | -        | LC404678 |
| <i>C. arenaria</i> (C.A.Gardner)<br>J.E.Piggin & J.J.Bruhl   | 111, Crisp 10803                                                  | WA        | LC404577 | LC404482 | LC404667 |
|                                                              | 125, Crisp 11187                                                  | WA        | LC404591 | LC404493 | LC404679 |
| <i>C. baileyi</i> C.T.White                                  | 132, Crisp 11289A                                                 | Qld       | LC404598 | LC404500 | LC404686 |
|                                                              | 001, Crisp 10153A                                                 | Qld       | LC404511 | LC404416 | LC404610 |
| <i>C. canescens</i> (Parl.) S.T.Blake                        | 002, Crisp 10118                                                  | SA        | LC404512 | LC404417 | LC404611 |
|                                                              | 135, Crisp 9703                                                   | WA        | LC404601 | LC404503 | LC404689 |
| <i>C. columellaris</i> F.Muell.                              | 004, Crisp 10321                                                  | Qld       | LC404514 | LC404419 | LC404613 |
|                                                              | 084, Crisp 10703                                                  | NSW       | LC404563 | LC404469 | LC404656 |
| <i>C. drummondii</i> (Parl.) Benth. &<br>Hook.f. ex F.Muell. | 114, Crisp 10998                                                  | WA        | LC404580 | LC404484 | -        |
|                                                              | 005, Crisp 9945                                                   | WA        | LC404515 | LC404420 | LC404614 |
| <i>C. endlicheri</i> (Parl.) F.M.Bailey                      | 007, Crisp 10345                                                  | Qld       | -        | LC404422 | LC404616 |
|                                                              | 016, Crisp 10340                                                  | Qld       | -        | LC404431 | LC404625 |
| <i>C. glaucophylla</i> Joy Thomps. &<br>L.A.S.Johnson        | 025, Crisp 9796                                                   | NSW       | LC404532 | LC404440 | LC404633 |
|                                                              | 136, Central Australia, CA1-1<br>(Sakaguchi <i>et al.</i> , 2013) | NT        | LC404602 | -        | LC404690 |
|                                                              | 142, WA3-1 (Sakaguchi <i>et al.</i> , 2013)                       | WA        | LC404608 | LC404509 | LC404696 |
| <i>C. gracilis</i> R.T.Baker                                 | 026, Crisp 9801                                                   | SA        | LC404533 | LC404441 | LC404634 |
|                                                              | 019, Crisp 9894                                                   | WA        | LC404526 | LC404434 | LC404627 |
| <i>C. intratropica</i> R.T.Baker &<br>H.G.Sm.                | 028, Crisp 9760                                                   | NT        | LC404535 | LC404443 | LC404636 |
|                                                              | 011, Crisp 10221                                                  | Qld       | LC404519 | LC404426 | LC404620 |
| <i>C. macleayana</i> (F.Muell.) F.Muell.                     | 014, Crisp 10138                                                  | NSW       | LC404522 | LC404429 | LC404623 |
|                                                              | 080, Mt Windsor 2, -16.28,<br>145.08                              | Qld       | LC404559 | LC404465 | LC404652 |
| <i>C. monticola</i> J.Garden                                 | 085, Crisp 10707                                                  | NSW       | LC404564 | LC404470 | LC404657 |
|                                                              | 015, Fethers 42 (CANB)                                            |           | LC404523 | LC404430 | LC404624 |
| <i>C. muelleri</i> (Parl.) Benth. &<br>Hook.f. ex F.Muell.   | 033, Beesley 281 (CANB)                                           | NSW       | LC404540 | LC404448 | LC404641 |
|                                                              | 087, Blue Mts B (Sakaguchi<br><i>et al.</i> , 2013)               | NSW       | LC404566 | LC404472 | LC404659 |

|                                                       |                                          |               |          |          |          |
|-------------------------------------------------------|------------------------------------------|---------------|----------|----------|----------|
| <i>C. neocaledonica</i> Dümmer                        | 036, cult. University of Tasmania, UTAS1 | New Caledonia | LC404543 | LC404451 | LC404644 |
|                                                       | 041, cult. University of Tasmania, UTAS2 | New Caledonia | LC404547 | LC404455 | LC404648 |
| <i>C. oblonga</i> Rich. subsp. <i>oblonga</i>         | 130, TAS1-1                              | Tas           | LC404596 | LC404498 | LC404684 |
|                                                       | 131, TAS1-2                              | Tas           | LC404597 | LC404499 | LC404685 |
| <i>C. oblonga</i> subsp. <i>corangensis</i> K.D.Hill  | 078, Corang River 1, - 35.204, 150.051   | NSW           | LC404557 | LC404463 | LC404650 |
|                                                       | 079, Corang River 2, - 35.204, 150.051   | NSW           | LC404558 | LC404464 | LC404651 |
| <i>C. oblonga</i> Rich. subsp. <i>parva</i> K.D.Hill  | 127, Crisp 11285                         | NSW           | LC404593 | LC404495 | LC404681 |
|                                                       | 128, Crisp 11286                         | NSW           | LC404594 | LC404496 | LC404682 |
| <i>C. pancheri</i> (Carrière) Byng                    | 037, cult. University of Tasmania, UTAS1 | New Caledonia | LC404544 | LC404452 | LC404645 |
|                                                       | 046, cult. University of Tasmania, UTAS2 | New Caledonia | LC404552 | LC404460 | LC404649 |
| <i>C. preissii</i> Miq.                               | 119, Crisp 10025                         | WA            | LC404585 | LC404488 | LC404673 |
|                                                       | 115, Crisp 11016                         | WA            | LC404581 | LC404485 | LC404669 |
| <i>C. pyramidalis</i> (Miq.) J.E.Piggin & J.J.Bruhl   | 022, Crisp 10009                         | WA            | LC404529 | LC404437 | LC404630 |
|                                                       | 112, Crisp 10881                         | WA            | LC404578 | LC404483 | LC404668 |
| <i>C. rhomboidea</i> R.Br. ex Rich. & A.Rich.         | 086, L. Prior, Blue Mts, tree A          | NSW           | LC404565 | LC404471 | LC404658 |
|                                                       | 034, cult. University of Tasmania, UTAS1 |               | LC404541 | LC404449 | LC404642 |
| <i>C. roei</i> (Endl.) F.Muell.                       | 018, Crisp 9922                          | WA            | LC404525 | LC404433 | LC404626 |
|                                                       | 116, Crisp 11040                         | WA            | LC404582 |          | LC404670 |
| <i>C. sulcata</i> (Parl.) Schltr.                     | 035, cult. University of Tasmania, UTAS1 | New Caledonia | LC404542 | LC404450 | LC404643 |
|                                                       | 040, cult. University of Tasmania, UTAS2 | New Caledonia | LC404546 | LC404454 | LC404647 |
| <i>C. tuberculata</i> R.Br. ex R.T.Baker & H.G.Sm.    | 020, Crisp 9975                          | WA            | LC404527 | LC404435 | LC404628 |
| <i>C. verrucosa</i> (A.Cunn. ex Endl.) R.Br. ex Mirb. | 021, Crisp 9883                          | SA            | LC404528 | LC404436 | LC404629 |
|                                                       | 123, L. Prior, Calder Hwy 5              | Vic           | LC404589 | LC404492 | LC404677 |

|                                                   |                                           |               |          |          |          |
|---------------------------------------------------|-------------------------------------------|---------------|----------|----------|----------|
| <i>Diselma archeri</i> Hook.f.                    | 042, cult. University of Tasmania, UTAS1  | Tas           | LC404548 | LC404456 | -        |
| <i>Fitzroya cupressoides</i> (Molina) I.M.Johnst. | 043, cult. University of Tasmania, UTAS1  | Patagonia     | LC404549 | LC404457 | -        |
|                                                   | 094, Crisp 10673                          | Argentina     | LC404572 | LC404478 | -        |
| <i>Libocedrus austrocaledonica</i> Brongn. & Gris | 107, cult. Royal Tasmanian Botanic Garden | New Caledonia | LC404574 | LC404479 | LC404663 |
| <i>L. bidwillii</i> Hook.f.                       | 106, cult. Royal Tasmanian Botanic Garden | New Zealand   | LC404573 | -        | LC404662 |
| <i>L. chevalieri</i> J.Buchholz                   | 108, cult. Royal Tasmanian Botanic Garden | New Caledonia | LC404575 | LC404480 | LC404664 |
| <i>L. yateensis</i> Guillaumin                    | 045, cult. University of Tasmania, UTAS1  | New Caledonia | LC404551 | LC404459 | -        |
| <i>Papuacedrus papuana</i> (F. Muell.) H.L. Li    | 047, cult. University of Tasmania, UTAS1  | New Guinea    | LC404553 | -        | -        |
| <i>Pilgerodendron uviferum</i> (D. Don) Florin    | 048, cult. University of Tasmania, UTAS1  | Argentina     | LC404554 | LC404461 | -        |
|                                                   | 093, Crisp 10672                          | Argentina     | LC404571 | LC404477 | -        |
| <i>Widdringtonia cedarbergensis</i> J.A.Marsh     | 049, cult. University of Tasmania, UTAS1  | South Africa  | LC404555 | -        | -        |
| <i>W. schwarzii</i> (Marloth) Mast.               | 050, cult. University of Tasmania, UTAS1  | South Africa  | LC404556 | LC404462 | -        |

---

**Cupressaceae subfam.**

**Cupressoideae**

|                                                     |                             |                           |   |   |   |
|-----------------------------------------------------|-----------------------------|---------------------------|---|---|---|
| <i>Calocedrus decurrens</i> (Torr.) Florin          | 096, Crisp 10686            | USA, Mexico               | - | - | - |
| <i>C. formosana</i> (Florin) Florin                 | 053, cult. Kyoto University | Taiwan                    | - | - | - |
| <i>Chamaecyparis obtusa</i> (Siebold & Zucc.) Endl. | 056, cult. Kyoto University | Japan                     | - | - | - |
| <i>C. pisifera</i> (Siebold & Zucc.) Endl.          | 055, cult. Kyoto University | Japan                     | - | - | - |
| <i>Cupressus cashmeriana</i> Royle ex Carr.         | 097, Crisp 10687            | Himalayas                 | - | - | - |
| <i>C. funebris</i> Endl.                            | 059, cult. Kyoto University | China, Vietnam            | - | - | - |
| <i>C. sempervirens</i> L.                           | 060, cult. Kyoto University | Mediterranean             | - | - | - |
| <i>C. torulosa</i> D.Don ex Lamb.                   | 102, Crisp 10692            | Himalayas, China, Vietnam | - | - | - |

|                                                    |                             |               |   |   |   |
|----------------------------------------------------|-----------------------------|---------------|---|---|---|
| <i>Hesperocyparis arizonica</i><br>(Greene) Bartel | 099, Crisp 10689            | USA, Mexico   | - | - | - |
| <i>H. macrocarpa</i> (Hartw. ex<br>Gordon) Bartel  | 100, Crisp 10690            | California    | - | - | - |
| <i>Juniperus chinensis</i> L.                      | 061, cult. Kyoto University | East Asia     | - | - | - |
| <i>J. chinensis</i> var. <i>sargentii</i> A.Henry  | 063, cult. Kyoto University | Japan         | - | - | - |
| <i>J. deppeana</i> Steud.                          | 103, Crisp 10693            | USA, Mexico   | - | - | - |
| <i>J. rigida</i> Siebold & Zucc.                   | 062, cult. Kyoto University | East Asia     | - | - | - |
| <i>Platycladus orientalis</i> (L.) Franco          | 069, cult. Kyoto University | East Asia     | - | - | - |
| <i>Tetraclinis articulata</i> (Vahl) Mast.         | 104, cult. UC Davis         | Mediterranean | - | - | - |
|                                                    | 105, cult. UC Davis         | Mediterranean | - | - | - |
| <i>Thuja occidentalis</i> L.                       | 071, cult. Kyoto University | Canada, USA   | - | - | - |

---

**Other Cupressaceae subfamilies**

|                                                           |                             |                      |   |   |          |
|-----------------------------------------------------------|-----------------------------|----------------------|---|---|----------|
| <i>Athrotaxis selaginoides</i> D.Don                      | 109, Mt Read                | Tas                  | - | - | LC404665 |
| <i>Cryptomeria japonica</i> (Thunb. ex<br>L.f.) D.Don     | 057, cult. Kyoto University | China, Japan         | - | - | -        |
| <i>Cunninghamia lanceolata</i> (Lamb.)<br>Hook.           | 058, cult. Kyoto University | SE Asia              | - | - | -        |
| <i>Metasequoia glyptostroboides</i><br>H.H.Hu & W.C.Cheng | 064, cult. Kyoto University | China                | - | - | -        |
| <i>Sequoia sempervirens</i> (D. Don)<br>Endl.             | 065, cult. Kyoto University | Western USA          | - | - | -        |
| <i>Sequoiadendron giganteum</i><br>(Lindl.) J. Buchholz   | 095, Crisp 10685            | California           | - | - | -        |
| <i>Taiwania cryptomeroides</i> Hayata                     | 066, cult. Kyoto University | Vietnam, Taiwan      | - | - | -        |
| <i>Taxodium distichum</i> (L.) Rich.                      | 068, cult. Kyoto University | SE USA               | - | - | -        |
| <i>T. mucronatum</i> Ten.                                 | 067, cult. Kyoto University | Mexico,<br>Guatemala | - | - | -        |

---



**Table S2** Loci sequenced, primers used for PCR and their design sources.

| <b>Locus</b>                    |    | <b>Primer code</b>   | <b>Primer sequence</b>        | <b>Source</b>                 |
|---------------------------------|----|----------------------|-------------------------------|-------------------------------|
| <b>Chloroplast DNA</b>          |    |                      |                               |                               |
| <i>rbcL</i> gene                | F: | rbcL-F               | ATGTCACCACAAACAGAACTAAAGCAAGT | (Little <i>et al.</i> , 2004) |
|                                 | R: | rbcL-R               | TCACAAGCAGCAGCTAGTTCAGGACTC   | (Little <i>et al.</i> , 2004) |
| <i>matK</i> gene                | F: | matK-F               | CCAAATTCGTTCTCTCTGTG          | (Kusumi <i>et al.</i> , 2000) |
|                                 | R: | matK-R               | TATCCATGAGTCAGGAGAG           | (Kusumi <i>et al.</i> , 2000) |
| matK–trnK                       | F: | lvy5-matK6           | CCATGATCATGAGCAAGTGC          | (Grivet & Petit, 2002)        |
|                                 | R: | lvy5-K1K2-trnK24     | CAACGGTAGAGTACTCGGCTTTTA      | (Grivet & Petit, 2002)        |
| rpl16                           | F: | rpl16F71             | GCTATGCTTAGTGTGTGACTCGTTG     | (Shaw <i>et al.</i> , 2005)   |
|                                 | R: | rpl16R1516           | CCCTTCATTCTTCTCTATGTTG        | (Shaw <i>et al.</i> , 2005)   |
| psbH–psbB                       | F: | psbB                 | TCAAAYRGTYGTGTAGCCAT          | (Shaw <i>et al.</i> , 2005)   |
|                                 | R: | psbH                 | TCCAAAAANKKGGAGATCCAAC        | (Shaw <i>et al.</i> , 2005)   |
| trnL–trnF                       | F: | TabC                 | CGAAATCGGTAGACGCTACG          | (Shaw <i>et al.</i> , 2005)   |
|                                 | R: | TabF                 | ATTTGAACTGGTGACACGAG          | (Shaw <i>et al.</i> , 2005)   |
| trnH–psbA                       | F: | trnH <sup>GUG</sup>  | CGCGCATGGTGGATTCACAATCC       | (Shaw <i>et al.</i> , 2005)   |
|                                 | R: | psbA                 | GTTATGCATGAACGTAATGCTC        | (Shaw <i>et al.</i> , 2005)   |
| petG–trnP                       | F: | petG                 | GGTCTAATTCCTATAACTTTGGC       | (Huang <i>et al.</i> , 2002)  |
|                                 | R: | trnP                 | GGGATGTGGCGCAGCTTGG           | (Huang <i>et al.</i> , 2002)  |
| trnC–trnD                       | F: | trnC (tRNA-Cys(GCA)) | CCAGTTCAAATCTGGGTGTC          | (Lee & Wen, 2004)             |
|                                 | R: | petN 1R              | CCCAAGCAAGACTTACTATATCC       | (Lee & Wen, 2004)             |
| <b>Nuclear loci</b>             |    |                      |                               |                               |
| c257: inorganic pyrophosphatase | F: | c257-F               | TCATCGGTTTGATTGTTGGA          | Designed for this study       |
|                                 | R: | c257-R               | CAGCCTTATGGGGATCTGAA          | Designed for this study       |
| c22306: erd1                    | F: | c22306-F             | GTGATTCCCGACTCCAAAAA          | Designed for this study       |

protein

R: c22306-R AGTCTGAACCTCCGACCTG

Designed for this study

c36749: alpha-  
glucan protein

F: c36749-F GAAAGGATATCCGCGAACAA

Designed for this study

synthase

R: c36749-R TTCCTGCTCTGAGGTCGGTA

Designed for this study

---



**Table S3** Molecular-clock calibrations. Units are in Ma. Abbreviations: M = mean; O = offset; N = normal distribution; SD = standard deviation; L = lower; U = upper. Placements on the tree are all expressed in terms of two taxa that diverge at that node, i.e. at the MRCA of the specified taxa.

| Number<br>(Fig. S3) | Name                  | Placement on tree                        | Lognormal<br>priors set            | Uniform<br>priors set             | Explanation (if needed) with citations                                                                               |
|---------------------|-----------------------|------------------------------------------|------------------------------------|-----------------------------------|----------------------------------------------------------------------------------------------------------------------|
| 1                   | Root                  | <i>Cunninghamia</i> –<br><i>Taiwania</i> | Normal:<br>M = 215.0,<br>SD = 2.5  | Normal:<br>M = 215.0,<br>SD = 2.5 | Root calibration, given a normal prior, using mean and SD of estimates by Mao <i>et al.</i> (2012)                   |
| 2                   | Athro_st              | <i>Athrotaxis</i> – <i>Callitris</i>     | O = 105.0,<br>M = 2.0, SD<br>= 1.0 | L = 105.0;<br>U = 220.            | Mao <i>et al.</i> (2012). Upper limit in this and the following priors is equal to the mean rootheight plus two SDs. |
| 3                   | Sequoi_cr             |                                          | O = 92.8,<br>M = 2.0, SD<br>= 1.0  | L = 92.8;<br>U = 220.             | Mao <i>et al.</i> (2012)                                                                                             |
| 4                   | Taxodioid_cr          |                                          | O = 111.0,<br>M = 2.0, SD<br>= 1.0 | L = 111.0;<br>U = 220.            | Mao <i>et al.</i> (2012)                                                                                             |
| 5                   | Callitroid-Cupressoid | Callitroideae–<br>Cupressoideae          | O = 93.5,<br>M = 2.0, SD           | L = 93.5;<br>U = 220.             | <i>Widdringtonia americana</i> , which likely belongs to one of these subfamilies (Stockey <i>et al.</i> , 2005).    |

|    |                             |                                                                      |                                                               |                                                                                                                                                                                                                                                                                                                                        |
|----|-----------------------------|----------------------------------------------------------------------|---------------------------------------------------------------|----------------------------------------------------------------------------------------------------------------------------------------------------------------------------------------------------------------------------------------------------------------------------------------------------------------------------------------|
| 6  | Cupressoid_cr               | <i>Thuja–Cupressus</i>                                               | = 1.0<br>O = 83.0, L = 83.0;<br>M = 2.0, SD U = 220.<br>= 1.0 | The oldest fossil is the late Cretaceous ' <i>Chamaecyparis corpulenta</i> (McIver 1994; Kotyk <i>et al.</i> , 2003; Stockey <i>et al.</i> , 2005), now considered to combined features of <i>Cupressus</i> and <i>Thuja</i> . Therefore, it is a good candidate for placement at MRCA of these lineages, ie crown node of Cupresseae. |
| 7  | Calocedrus_st               | <i>Calocedrus–<br/>Tetraclinis</i>                                   | O = 47.0, L = 47.0; U<br>M = 2.0, SD = 220.<br>= 1.0          | <i>Tetraclinis</i> dates from the early Eocene (Stockey <i>et al.</i> , 2005).                                                                                                                                                                                                                                                         |
| 8  | Juniperus_cr                |                                                                      | O = 34.0, L = 34.0;<br>M = 2.0, SD U = 220.<br>= 1.0          | Mao <i>et al.</i> (2012)                                                                                                                                                                                                                                                                                                               |
| 9  | Callitroid_cr               | <i>Papuacedrus -<br/>Callitris</i>                                   | O = 62.0, L = 62.0;<br>M = 2.0, SD U = 220.<br>= 1.0          | <i>Libocedrus</i> sp. cf. <i>bidwillii</i> (Pole, 1998) and other fossils of Palaeocene age (Hill & Brodribb, 1999), (Whang & Hill, 1999), which have the distinctive foliage characters of <i>Papuacedrus</i> , <i>Austrocedrus</i> and <i>Libocedrus</i> .                                                                           |
| 10 | " <i>C. octothamna</i> "    | <i>Austrocedrus–<br/>Callitris</i> or<br><i>Libocedrus–Callitris</i> | O = 99.6, NA<br>M = 2.0, SD<br>= 1.0                          | Peters (1985). Alternative placements (shown in Fig. S3), or exclusion, of this calibration were tested using Bayes factors.                                                                                                                                                                                                           |
| 11 | <i>Libocedrus_mesibovii</i> | <i>Libocedrus–</i>                                                   | O = 24.0, NA                                                  | Hill & Carpenter (1989). Interpretation and placement of                                                                                                                                                                                                                                                                               |

|    |              |                                |                                                      |  |                                                                                                                                                                |
|----|--------------|--------------------------------|------------------------------------------------------|--|----------------------------------------------------------------------------------------------------------------------------------------------------------------|
|    |              | <i>Pilgerodendron</i>          | M = 2.0, SD<br>= 1.0                                 |  | this fossil are discussed in the text. Bayes Factors preferred exclusion of this calibration.                                                                  |
| 12 | Fitzroya_st  | <i>Fitzroya–Diselma</i>        | O = 30.0, L = 30.0;<br>M = 2.0, SD U = 220.<br>= 1.0 |  | The oldest fossil is <i>F. acutifolia</i> (Hill & Paull, 2003).                                                                                                |
| 13 | Callitris_cr | <i>C. roei–C. glaucophylla</i> | O = 28.3, L = 28.3;<br>M = 2.0, SD U = 220.<br>= 1.0 |  | <i>C. leaensis</i> , foliage and cones from early Oligocene of Tasmania (Paull & Hill, 2010), placed at the crown node of the genus (Mao <i>et al.</i> , 2012) |

**Table S4** Model comparisons using Bayes factors calculated from marginal likelihoods in BEAST. For each test, parameters not under comparison are held constant. Models are preference-ranked by their marginal log likelihoods. Asterisks after the Bayes Factors (BF) indicate their interpretation according to Raftery (1995): \* = “positive” ( $2.2 \leq BF < 6$ ), \*\* = “strong” ( $6 \leq BF < 10$ ) and \*\*\* = “very strong” ( $BF \geq 10$ ) evidence favouring the model with the higher likelihood. Absence of an asterisk indicates no preference for either model ( $0 < BF < 2.2$ , “not worth more than a bare mention”). Results are shown for both Path (P) and Stepping Stone (SS) sampling.

| Question/comparison | Other settings held constant during comparison | Model 1 (preferred) | Model 2 (non-preferred) | Model 3 (least preferred) | Bayes Factor supporting best model |
|---------------------|------------------------------------------------|---------------------|-------------------------|---------------------------|------------------------------------|
| Clock model         | “ <i>C. octothamna</i> ” and <i>L.</i>         | Uncorrelated        | Random local            | NA                        | PS = 17.6***,                      |

|                                                                                                         |                                                                       |                                                               |                                  |                                         |                                                                      |
|---------------------------------------------------------------------------------------------------------|-----------------------------------------------------------------------|---------------------------------------------------------------|----------------------------------|-----------------------------------------|----------------------------------------------------------------------|
|                                                                                                         | <i>mesibovii</i> calibrations omitted                                 | lognormal                                                     | clocks                           |                                         | SS = 24.4***                                                         |
| Calibration priors: uniform versus lognormal distribution                                               | " <i>C. octothamna</i> " and <i>L. mesibovii</i> calibrations omitted | Lognormal                                                     | Uniform                          | NA                                      | PS = 29.7***,<br>SS = 31.4***                                        |
| Calibration 11 using <i>L. mesibovii</i> (24 Ma) at MRCA of <i>Libocedrus</i> and <i>Pilgerodendron</i> | " <i>C. octothamna</i> " calibration omitted                          | <i>L. mesibovii</i> excluded                                  | Inclusion of <i>L. mesibovii</i> | NA                                      | PS = 33***,<br>SS = 600***                                           |
| Calibration 10 using " <i>Callitris octothamna</i> " (99.6 Ma)                                          | No monophyly constraint; <i>L. mesibovii</i> calibration omitted      | Placement at MRCA of <i>Callitris</i> and <i>Austrocedrus</i> | Exclusion of calibration         | Placement at <i>Callitris</i> stem node | 1 vs 2: PS = 0.84,<br>SS = 0.22.<br>1 vs 3: PS = 4.72*,<br>SS = 5.2* |

**Table S5** Trait data: fossil morphology and fire-adaptive traits. Trait states as follows.

Phyllotaxis: 0 = ternate, 1 = decussate, 2 = spiral, 3 = quadrate. Leaf dimorphy: 0 = monomorphic, 1 = dimorphic. Cone scale phyllotaxis: 0 = 2 x 3, 1 = decussate, 2 = 2 x 4. Serotiny: 0 = absent; 1 = present. Habitat fire-prone: 0 = no, 1 = yes. † indicates an extinct fossil species (*C. leaensis*). Characters were scored for this species from the detailed descriptions and photographic plates in Paull & Hill (2010).

| Taxon label                        | Leaf phyllotaxis | Leaf dimorphy | Cone scale phyllotaxis | Serotiny | Habitat fire-prone |
|------------------------------------|------------------|---------------|------------------------|----------|--------------------|
| 000 <i>Callitris leaensis</i> †    | 0                | 0             | 0                      | 0        | 0                  |
| 001 <i>Callitris baileyi</i>       | 0                | 0             | 0                      | 0        | 1                  |
| 002 <i>Callitris canescens</i>     | 0                | 0             | 0                      | 1        | 1                  |
| 004 <i>Callitris columellaris</i>  | 0                | 0             | 0                      | 0        | 1                  |
| 005 <i>Callitris drummondii</i>    | 0                | 0             | 0                      | 1        | 1                  |
| 007 <i>Callitris endlicheri</i>    | 0                | 0             | 0                      | 0        | 1                  |
| 011 <i>Callitris intratropica</i>  | 0                | 0             | 0                      | 0        | 1                  |
| 014 <i>Callitris macleayana</i>    | 0 & 3            | 0             | 0 & 2                  | 0        | 1                  |
| 015 <i>Callitris monticola</i>     | 0                | 0             | 0                      | 1        | 1                  |
| 016 <i>Callitris endlicheri</i>    | 0                | 0             | 0                      | 1        | 1                  |
| 018 <i>Callitris roei</i>          | 0                | 0             | 0                      | 1        | 1                  |
| 019 <i>Callitris gracilis</i>      | 0                | 0             | 0                      | 0        | 1                  |
| 020 <i>Callitris tuberculata</i>   | 0                | 0             | 0                      | 1        | 1                  |
| 021 <i>Callitris verrucosa</i>     | 0                | 0             | 0                      | 1        | 1                  |
| 022 <i>Callitris pyramidalis</i>   | 0                | 0             | 0                      | 1        | 1                  |
| 025 <i>Callitris glaucophylla</i>  | 0                | 0             | 0                      | 0        | 1                  |
| 026 <i>Callitris gracilis</i>      | 0                | 0             | 0                      | 1        | 1                  |
| 028 <i>Callitris intratropica</i>  | 0                | 0             | 0                      | 0        | 1                  |
| 033 <i>Callitris muelleri</i>      | 0                | 0             | 0                      | 1        | 1                  |
| 034 <i>Callitris rhomboidea</i>    | 0                | 0             | 0                      | 1        | 1                  |
| 035 <i>Callitris sulcata</i>       | 0                | 0             | 0                      | 0        | 0                  |
| 036 <i>Callitris neocaledonica</i> | 0                | 0             | 0                      | 0        | 0                  |
| 037 <i>Callitris pancheri</i>      | 3                | 0             | 2                      | 0        | 0                  |

|                                                 |       |   |       |   |   |
|-------------------------------------------------|-------|---|-------|---|---|
| 040 <i>Callitris sulcata</i>                    | 0     | 0 | 0     | 0 | 1 |
| 041 <i>Callitris neocaledonica</i>              | 0     | 0 | 0     | 0 | 1 |
| 042 <i>Diselma archeri</i>                      | 0 & 1 | 0 | 1     | 0 | 0 |
| 043 <i>Fitzroya cupressoides</i>                | 0     | 0 | 0     | 0 | 0 |
| 045 <i>Libocedrus yateensis</i>                 | 1     | 1 | 1     | 0 | 0 |
| 046 <i>Callitris pancheri</i>                   | 3     | 0 | 2     | 0 | 1 |
| 047 <i>Papuacedrus papuana</i>                  | 1     | 1 | 1     | 0 | 0 |
| 048 <i>Pilgerodendron uviferum</i>              | 0 & 1 | 0 | 1     | 0 | 1 |
| 049 <i>Widdringtonia cedarbergensis</i>         | 1 & 2 | 0 | 0     | 1 | 1 |
| 050 <i>Widdringtonia schwarzii</i>              | 1 & 2 | 0 | 1     | 1 | 1 |
| 053 <i>Calocedrus formosana</i>                 | 1     | 1 | 1     | 0 | 0 |
| 055 <i>Chamaecyparis pisifera cv. squarrosa</i> | 1     | 1 | 1     | 0 | 0 |
| 056 <i>Chamaecyparis obtusa</i>                 | 1     | 1 | 1     | 0 | 0 |
| 059 <i>Cupressus funebris</i>                   | 1     | 0 | 1     | 0 | 0 |
| 060 <i>Cupressus sempervirens</i>               | 1     | 0 | 1     | 1 | 1 |
| 061 <i>Juniperus chinensis</i>                  | 1     | 0 | 1     | 0 | 0 |
| 062 <i>Juniperus rigida</i>                     | 0     | 0 | 0     | 0 | 1 |
| 063 <i>Juniperus chinensis var sargentii</i>    | 1     | 0 | 1     | 0 | 0 |
| 069 <i>Platycladus orientalis</i>               | 1     | 1 | 1     | 0 | 1 |
| 071 <i>Thuja occidentalis</i>                   | 1     | 1 | 1     | 0 | 0 |
| 078 <i>Callitris oblonga corangensis</i>        | 0     | 0 | 0     | 1 | 1 |
| 079 <i>Callitris oblonga corangensis</i>        | 0     | 0 | 0     | 1 | 1 |
| 080 <i>Callitris macleayana</i>                 | 0 & 3 | 0 | 0 & 2 | 0 | 1 |
| 084 <i>Callitris columellaris</i>               | 0     | 0 | 0     | 0 | 1 |
| 085 <i>Callitris monticola</i>                  | 0     | 0 | 0     | 1 | 1 |
| 086 <i>Callitris rhomboidea</i>                 | 0     | 0 | 0     | 1 | 1 |
| 087 <i>Callitris muelleri</i>                   | 0     | 0 | 0     | 1 | 1 |
| 089 <i>Austrocedrus chilensis</i>               | 1     | 1 | 1     | 0 | 1 |
| 090 <i>Austrocedrus chilensis</i>               | 1     | 1 | 1     | 0 | 0 |
| 093 <i>Pilgerodendron uviferum</i>              | 0 & 1 | 0 | 1     | 0 | 0 |

|                                        |   |   |   |   |   |
|----------------------------------------|---|---|---|---|---|
| 094 <i>Fitzroya cupressoides</i>       | 0 | 0 | 0 | 0 | 0 |
| 096 <i>Calocedrus decurrens</i>        | 1 | 1 | 1 | 0 | 1 |
| 097 <i>Cupressus cashmeriana</i>       | 1 | 0 | 1 | 0 | 0 |
| 099 <i>Hesperocyparis arizonica</i>    | 1 | 0 | 1 | 1 | 1 |
| 100 <i>Hesperocyparis macrocarpa</i>   | 1 | 0 | 1 | 1 | 1 |
| 102 <i>Cupressus torulosa</i>          | 1 | 0 | 1 | 1 | 1 |
| 103 <i>Juniperus deppeana</i>          | 1 | 0 | 1 | 0 | 1 |
| 104 <i>Tetraclinis articulata</i>      | 1 | 1 | 1 | 1 | 1 |
| 105 <i>Tetraclinis articulata</i>      | 1 | 1 | 1 | 1 | 1 |
| 106 <i>Libocedrus bidwillii</i>        | 1 | 1 | 1 | 0 | 0 |
| 107 <i>Libocedrus austrocaledonica</i> | 1 | 1 | 1 | 0 | 0 |
| 108 <i>Libocedrus chevalieri</i>       | 1 | 1 | 1 | 0 | 1 |
| 111 <i>Callitris arenaria</i>          | 0 | 0 | 0 | 1 | 1 |
| 112 <i>Callitris pyramidalis</i>       | 0 | 0 | 0 | 1 | 1 |
| 113 <i>Callitris acuminata</i>         | 0 | 0 | 0 | 1 | 1 |
| 114 <i>Callitris drummondii</i>        | 0 | 0 | 0 | 1 | 1 |
| 115 <i>Callitris preissii</i>          | 0 | 0 | 0 | 1 | 1 |
| 116 <i>Callitris roei</i>              | 0 | 0 | 0 | 1 | 1 |
| 119 <i>Callitris preissii</i>          | 0 | 0 | 0 | 1 | 1 |
| 123 <i>Callitris verrucosa</i>         | 0 | 0 | 0 | 1 | 1 |
| 124 <i>Callitris acuminata</i>         | 0 | 0 | 0 | 1 | 1 |
| 125 <i>Callitris arenaria</i>          | 0 | 0 | 0 | 1 | 1 |
| 127 <i>Callitris oblonga parva</i>     | 0 | 0 | 0 | 1 | 1 |
| 128 <i>Callitris oblonga parva</i>     | 0 | 0 | 0 | 1 | 1 |
| 130 <i>Callitris oblonga oblonga</i>   | 0 | 0 | 0 | 1 | 1 |
| 131 <i>Callitris oblonga oblonga</i>   | 0 | 0 | 0 | 1 | 1 |
| 132 <i>Callitris baileyi</i>           | 0 | 0 | 0 | 0 | 1 |
| 135 <i>Callitris canescens</i>         | 0 | 0 | 0 | 1 | 1 |
| 136 <i>Callitris glaucophylla</i>      | 0 | 0 | 0 | 0 | 1 |
| 142 <i>Callitris glaucophylla</i>      | 0 | 0 | 0 | 0 | 1 |

---

**Methods S1** Further details on assessment of previously unused fossils for calibration.

## 1. “*Callitris octothamna*”

These seed cone fossils could greatly increase the age estimate of *Callitris*, being from Cretaceous (c. 99.6 Ma) sediments near Winton, Queensland. The original assignment of this fossil to *Callitris* (Peters, 1985) was based on similarities of the shapes and arrangement of the leaves and seed cone scales. We used parsimony and maximum likelihood (Mk1 model, Lewis, 2001) mapping of three morphological characters (phyllotaxis, leaf dimorphism and cone scale arrangement) to assess whether the fossils have unique defining characters (synapomorphies) for any lineages within Callitroideae, including *Callitris*.

(a). Phyllotaxis. Leaves on the cone peduncle of “*C. octothamna*” are arranged in alternating ternate whorls with free tips (Peters, 1985). This is a derived feature relative to other Cupressaceae and is present in all adult *Callitris s.l.* except the New Caledonian *Callitris*, which has leaves in whorls of four (Table 1). Paedomorphosis likely accounts for quadrate leaves in adult plants, such as *Callitris pancheri* and *C. macleayana* (Supporting Information Fig. S4), because quadrate phyllotaxis occurs in seedlings of all Cupressaceae, including *Callitris* (Farjon, 2005). Within Callitroideae, ternate phyllotaxis is also present variably (to spiral) in adult plants of *Fitzroya*, *Diselma* and *Callitris macleayana*. Decussate adult phyllotaxis is plesiomorphic (Supporting Information Fig. S4) and predominant in Cupressoideae and other Callitroideae (*Austrocedrus*, *Libocedrus* and *Papuacedrus*). However, phyllotaxis is polymorphic in some callitroids: decussate or ternate in *Pilgerodendron*, decussate or spiral in *Widdringtonia*, and decussate or ternate in *Diselma*. Ternate phyllotaxis appears to be independently derived in Cupressoids (some *Juniperus*, e.g. *J. rigida*). The combination of this character-state (i.e., alternating ternate whorls) with fusion of the leaf to the internode for most of its basal length (not mapped) is unique to *Callitris* (Piggin & Bruhl, 2010). “*Callitris octothamna*” does not exhibit this distinctive basal leaf fusion but the fossils do not include vegetative foliage, which can differ from the scale leaves that are inserted on the cone peduncle (Paull & Hill, 2010). Parsimony and ML mapping (Table 2, Supporting Information Fig. S4) indicates that the transition between the plesiomorphic (decussate) and derived (ternate) state for phyllotaxis in callitroids is reconstructed as occurring between node B and the *Callitris*



stem (node A), with either partial reversal or a parallel origin of ternate phyllotaxis in *Widdringtonia* and *Diselma*.

(b). Leaf dimorphism. The plesiomorphic state of this character in Callitroideae (Supporting Information Fig. S5) is leaves dimorphic and compressed into one plane with those on the face of the plane being smaller and  $\pm$  appressed, while the alternate leaf-pairs are marginal, larger and spreading laterally (Farjon, 2005). In the apomorphic state, leaves are monomorphic, even when decussate, and not compressed into one plane (Farjon, 2005). The monomorphic state is synapomorphic for all extant *Callitris* + *Widdringtonia*, *Fitzroya* and *Diselma*, but occurs homoplasiously with separate origins in *Pilgerodendron* and Cupressoideae (*Cupressus-Juniperus* clade) (Supporting Information Fig. S5, Table S5). The dimorphic state occurs throughout other callitroids (*Papuacedrus*, *Austrocedrus*, *Libocedrus* and *Austrocedrus*) and is also found in Cupressoideae (Supporting Information Fig. S5, Table S5). "*Callitris octothamna*" has the derived state, with monomorphic scale-leaves on the peduncles. Trait mapping (Table 2, Supporting Information Fig. S5) reconstructs the transition between the plesiomorphic (dimorphic) and derived (monomorphic) state for callitroid leaves between node B and the *Callitris* stem (node A), with a parallel origin of monomorphy in *Pilgerodendron*.

(c). Cone-scale arrangement. Cone-scale and vegetative phyllotaxis are generally congruent in species of Callitroideae and Cupressoideae (Supporting Information Table S5) with few exceptions, one of which is "*C. octothamna*". The plesiomorphic cone-scale arrangement is decussate and predominates across Cupressoideae and Callitroideae, except in *Juniperus* and the CFDW clade. However, the number of decussate pairs of cone scales varies (Farjon, 2005; Jagel & Dörken, 2015a; Jagel & Dörken, 2015b). Nearly all *Callitris* species have the derived state of two whorls of three, crowded into in a single pseudo-whorl of six alternately large and small scales. Exceptionally, in paedomorphic species, *Callitris* has two whorls of four (like the leaves) and in *C. macleayana* cone scale phyllotaxis is either 2 x 3 or 2 x 4, being congruent with leaf phyllotaxis of the subtending branch. "*Callitris octothamna*" cones closely resemble those of the extant species, and were described by Peters (1985) as a single whorl of eight, but are more likely 2 x 4, as in *Callitris* and *C. macleayana*. Closer examination of the photographs of cones in Peters (1985: figs 346–348) indicates that the alternate, smaller cone scales form an

outer whorl. Cone-scales of *Papuacedrus*, *Pilgerodendron*, *Libocedrus* and *Austrocedrus* are strictly decussate, which is the plesiomorphic condition. The *Widdringtonia-Diselma-Fitzroya* clade, which is sister to *Callitris*, is a mixture of 2 x 3 and 2 x 2. Mapped on the tree (Supporting Information Fig. S6; Table 2), the transition to 2 x 3 could have occurred in the stem of the CFDW clade (node B) with reversals in *Widdringtonia* and *Diselma*, or in the stem of *Callitris* (node A), with an independent gain in *Diselma*.

Given the polymorphisms and homoplasy, cone-scale phyllotaxis is unhelpful in placing “*C. octothamna*”, which has the unusual arrangement of cone scales in two whorls of four. Elsewhere in Callitroideae, only *Callitris* and *C. macleayana* have 2 x 4 (a rare variant in the latter), probably reflecting retention of juvenile leaves in the adult plant. However, in contrast to all extant callitroids (including *Callitris* and *C. macleayana*), “*C. octothamna*” uniquely combines ternate adult leaf phyllotaxis with 2 x 4 cone-scale phyllotaxis on the same branchlet. In Cupressoideae too, cone-scale arrangement usually echoes that of leaf phyllotaxis, except that cone scales are decussate in some species of *Juniperus* that have ternate leaves (Jagel & Dörken, 2015a).

(d). Adult leaf-base adnation to stem. This occurs in varying degrees across the callitroids but adnation for > 70% of length is claimed to be a synapomorphy for *Callitris* (Piggin & Bruhl, 2010). However, as this character varies continuously, the 70% cut-off is arbitrary. In the former genus *Actinostrobus*, which is included within *Callitris*, adnation is developed to a lesser degree (55–65%) and thus reversed by the 70% criterion. Also, in the Oligocene fossil *C. leaensis* (calibration 13 in Supporting Information Fig. S3), the adult leaves vary in adnation from 0 to 66% (Paull & Hill, 2010). Adnation also varies continuously in adult foliage within individuals of cupressoids (e.g., *Cupressus* and *Juniperus*). These taxa have widely spaced leaves with lengthy adnation on main stems and crowded, non-adnate leaves on side branchlets and tips. We have not mapped adnation on the tree because it is a continuously varying and labile trait and not a useful cladistic character.

In conclusion, “*Callitris octothamna*” shares apomorphies with some taxa within the callitroids, including ternate leaf phyllotaxis, 2 x 4 cone-scale phyllotaxis and loss of leaf dimorphism. The transition between the plesiomorphic and derived state for each of these

three characters is reconstructed as occurring between node B (stem of the CFDW clade) and node A (the *Callitris* crown node) (Figs S4–S6, Table 3). Therefore, all three characters indicate placement of the fossil as a calibration at either node A or its parent (node B). We used Bayes Factors to choose the best node for this calibration (see main text). “*Callitris octothamna*” also has similarity to *Juniperus* in leaf phyllotaxis, leaf monomorphism, cone-scale arrangement and the contrasting phyllotaxis between leaves and cone-scales. However, in other characters, “*C. octothamna*” does not appear to be close to *Juniperus*, and these similarities are likely to be convergent in the cupressoid and callitroid clades.

## 2. *Libocedrus*

*Libocedrus* is extant only in New Zealand and New Caledonia, and fossils are known from south-eastern Australia and New Zealand. Its sister taxon, *Pilgerodendron*, has a single species endemic in Patagonia and no recognised fossils. *Libocedrus* fossils range in age from the Palaeocene (> 55 Ma) to the Oligo-Miocene boundary (c. 24 Ma) and, with a single exception, are strictly vegetative. The characters (both gross morphological and cuticular) used to assign these fossils to *Libocedrus* appear to be symplesiomorphic features of Callitroideae, found in *Papuacedrus*, *Austrocedrus* and *Pilgerodendron* (Hill & Carpenter, 1989; Hill & Brodribb, 1999; Farjon, 2005; Pole, 2007). Examples of symplesiomorphic leaf characters are decussate, coplanar phyllotaxis (Supporting Information Fig. S4) and dimorphy (Supporting Information Fig. S5).

Exceptionally, the Oligo–Miocene (c. 24 Ma) fossils from Little Rapid River in Tasmania (Hill & Carpenter, 1989) have calibration potential because they include a cone (*L. mesibovii*) and two taxa described from detached foliage (*L. morrisonii* and *L. jacksonii*). The cones of *Libocedrus* and *Pilgerodendron*, ‘show a close structural similarity’ (Jagel & Dörken, 2015b) but that of *L. mesibovii* is asymmetrical with one cone-scale in the lower pair being much smaller than the other (Hill & Carpenter, 1989). Examining online photos and a specimen (CANB 381111), we found that extant *Pilgerodendron* occasionally has unequal lower cone-scales. This asymmetry is otherwise unknown in extant callitroid cypresses, including *Libocedrus*. *Pilgerodendron* and *Libocedrus* share a synapomorphy of spinescent appendages, resembling

'Viking' helmet horns, near the cone-scale apices (Farjon, 2005). Spines are not actually present on the fossil of *L. mesibovii* (Hill & Carpenter, 1989) but there are scars that the authors surmised were remnants of detached spines. Associated with the *L. mesibovii* fossil were detached vegetative sprigs described as *L. morrisonii* and *L. jacksonii* (Hill & Carpenter, 1989: fig. 3). The authors considered that *L. mesibovii* and *L. jacksonii* might be from the same plant but concluded that they were distinct species. We consider the leaves of *L. mesibovii* to resemble those of *Pilgerodendron* as well as any extant *Libocedrus* species (cf. Farjon, 2005).

We conclude that *L. mesibovii* could represent *Pilgerodendron*, *Libocedrus*, a common ancestor of both, or their sister group. Accordingly, we used this fossil as a calibration at the MRCA of the two genera and tested its fit relative to other calibrations using Bayes Factors. Placing *L. mesibovii* one node lower, at the shared stem of *Libocedrus* and *Pilgerodendron*, has no effect on dating because that node is estimated to be c. 90 Ma in the absence of this c. 24 Ma calibration.

#### **Notes S1** References for Supporting Information.

**Byng JW. 2015.** *The gymnosperms handbook: A practical guide to extant families and genera of the world*. Hertford, UK: Plant Gateway Ltd.

**de Laubenfels DJ, Husby CE, Griffith MP. 2012.** Further nomenclatural action for the Cupresses (Cupressaceae). *Novon* 22: 8-15. doi: <http://dx.doi.org/10.3417/2010056>

**Farjon A. 2005.** *A monograph of Cupressaceae and Sciadopitys*. Kew: Royal Botanic Gardens.

**Grivet D, Petit RJ. 2002.** Phylogeography of the common ivy (*Hedera* sp.) in Europe: genetic differentiation through space and time. *Molecular Ecology* 11: 1351–1362.

**Hill KD 1998.** 'Gymnosperms'—the paraphyletic stem of seed plants. In: McCarthy PM ed. *Flora of Australia, vol. 48. Ferns, gymnosperms, and allied groups*. Melbourne: CSIRO Publishing, 505–526.

**Hill RS, Brodribb TJ. 1999.** Southern conifers in time and space. *Australian Journal of Botany* 47: 639–696.

- Hill RS, Carpenter RJ. 1989.** Tertiary gymnosperms from Tasmania: Cupressaceae. *Alcheringa* **13**: 89–102.
- Hill RS, Paull R. 2003.** *Fitzroya* (Cupressaceae) macrofossils from Cenozoic sediments in Tasmania, Australia. *Review of Palaeobotany and Palynology* **126**: 145–152.
- Huang SSF, Hwang SY, Lin TP. 2002.** Spatial pattern of chloroplast DNA variation of *Cyclobalanopsis glauca* in Taiwan and east Asia. *Molecular Ecology* **11**: 2349–2358.
- Jagel A, Dörken VM. 2015a.** Morphology and morphogenesis of the seed cones of the Cupressaceae—part II Cupressoideae. *Bulletin CCP* **4**: 51–78.
- Jagel A, Dörken VM. 2015b.** Morphology and morphogenesis of the seed cones of the Cupressaceae—part III: Callitroideae. *Bulletin CCP* **4**: 91–108.
- Kass RE, Raftery AE. 1995.** Bayes factors. *Journal of the American Statistical Association* **90**: 773–795.
- Kotyk MEA, Basinger JF, McIver EE. 2003.** Early Tertiary *Chamaecyparis* Spach from Axel Heiberg Island, Canadian High Arctic. *Canadian Journal of Botany-Revue Canadienne De Botanique* **81**: 113–130.
- Kusumi J, Tsumura Y, Yoshimaru H, Tachida H. 2000.** Phylogenetic relationships in Taxodiaceae and Cupressaceae sensu stricto based on *matK* gene, *chlL* gene, trnL-trnF IGS region, and trnL intron sequences. *American Journal of Botany* **87**: 1480–1488.
- Lee C, Wen J. 2004.** Phylogeny of *Panax* using chloroplast trnC–trnD intergenic region and the utility of trnC–trnD in interspecific studies of plants. *Molecular Phylogenetics and Evolution* **31**: 894–903.
- Lewis PO. 2001.** A likelihood approach to estimating phylogeny from discrete morphological character data. *Systematic Biology* **50**: 913–925.
- Little DP, Schwarzbach AE, Adams RP, Hsieh C-F. 2004.** The circumscription and phylogenetic relationships of *Callitropsis* and the newly described genus *Xanthocyparis* (Cupressaceae). *American Journal of Botany* **91**: 1872–1881.
- Mao K, Milne RI, Zhang L, Peng Y, Liu J, Thomas P, Mill RR, Renner SS. 2012.** The distribution of living Cupressaceae reflects the breakup of Pangea. *Proceedings of the National Academy of Sciences of the United States of America* **109**: 7793–7798.

- Paul R, Hill RS. 2010.** Early Oligocene *Callitris* and *Fitzroya* (Cupressaceae) from Tasmania. *American Journal of Botany* **97**: 809–820.
- Peters MD. 1985.** *A taxonomic analysis of a middle Cretaceous megafossil plant assemblage from Queensland, Australia*. PhD, University of Adelaide, Adelaide, SA, Australia.
- Piggin J, Bruhl JJ. 2010.** Phylogeny reconstruction of *Callitris* Vent. (Cupressaceae) and its allies leads to inclusion of *Actinostrobus* within *Callitris*. *Australian Systematic Botany* **23**: 69–93.
- Pole M. 1998.** Paleocene gymnosperms from Mount Somers, New Zealand. *Journal of the Royal Society of New Zealand* **28**: 375–403.
- Pole M. 2007.** Early Eocene dispersed cuticles and mangrove to rainforest vegetation at Strahan-Regatta Point, Tasmania. *Palaeontologia Electronica* **10**: 15A:66p
- Sakaguchi S, Bowman DMJS, Prior LD, Crisp MD, Linde CC, Tsumura Y, Isagi Y. 2013.** Climate, not Aboriginal landscape burning, controlled the historical demography and distribution of fire-sensitive conifer populations across Australia. *Proceedings of the Royal Society B: Biological Sciences* **280**: 20132182.
- Shaw J, Lickey EB, Beck JT, Farmer SB, Liu W, Miller J, Siripun KC, Winder CT, Schilling EE, Small RL. 2005.** The tortoise and the hare II: relative utility of 21 noncoding chloroplast DNA sequences for phylogenetic analysis. *American Journal of Botany* **92**: 142–166.
- Stockey RA, Kvacek J, Hill RS, Rothwell GW, Kvacek Z 2005.** The fossil record of Cupressaceae s. lat. In: Farjon A ed. *A monograph of Cupressaceae and Sciadopitys*. Kew: Royal Botanic Gardens, 54–68.
- Whang SS, Hill RS. 1999.** Late Palaeocene Cupressaceae macrofossils at Lake Bungarby, New South Wales. *Australian Systematic Botany* **12**: 241–254.
